# Supplementary material for: Synthesis and Antimicrobial Activity Evaluation of Homodrimane Sesquiterpenoids with a Benzimidazole Unit
Source: MDPI journal article supplement (doi:10.3390/molecules28030933), 2023-01-17

# SYNTHESIS AND ANTIMICROBIAL ACTIVITY EVALUATION OF HOMODRIMANE SESQUITERPENOIDS WITH BENZIMIDAZOLE UNIT

Lidia Lungu<sup>1</sup>, Svetlana Blaja<sup>1</sup>, Caleria Cucicova<sup>1</sup>, Alexandru Ciocarlan<sup>1</sup>, Alic Barba<sup>1</sup>, Veaceslav Kulciťki<sup>1</sup>, Sergiu Shova<sup>2</sup>, Nicoleta Vornicu<sup>3</sup>, Elisabeta-Irina Geana<sup>4</sup>, Ionel I. Mangalagiu<sup>5</sup>, and Aculina Aricu<sup>1\*</sup>

- <sup>1</sup> Chemistry of Natural and Biologically Active Compounds Laboratory, Institute of Chemistry, 3 Academiei Str., MD-2028 Chisinau, Moldova; [lidilungu@yahoo.com](mailto:lidilungu@yahoo.com) (L.L.); [svetlana-blaja@mail.ru](mailto:svetlana-blaja@mail.ru) (S.B.); [cucicovac@yahoo.com](mailto:cucicovac@yahoo.com) (C.C.); [algociocarlan@yahoo.com](mailto:algociocarlan@yahoo.com) (A.C.); [alicbarba@gmail.com](mailto:alicbarba@gmail.com) (A.B.); [kulcitki@yahoo.com](mailto:kulcitki@yahoo.com) (V.K.); [aculina.aricu@gmail.com](mailto:aculina.aricu@gmail.com) (A.A.)
- <sup>2</sup> "P. Poni" Institute of Macromolecular Chemistry, Aleea Grigore Ghica Voda 41-A, 700487 Iasi, Romania; [shova@icmpp.ro](mailto:shova@icmpp.ro) (S.S.)
- <sup>3</sup> Metropolitan Center of Research T.A.B.O.R., 9 Closca Str., RO-700066 Iasi, Romania; [cmctaboriasi@yahoo.com](mailto:cmctaboriasi@yahoo.com) (N.V.)
- <sup>4</sup> Department of Research and Development, National Research and Development Institute for Cryogenics and Isotopic Technologies—ICSI Rm. Valcea, 4th Uzinei Str., PO Raureni Box 7, 240050 Rm. Valcea, Romania; [irina.geana@icsi.ro](mailto:irina.geana@icsi.ro) (E.-I.G.)
- <sup>5</sup> Faculty of Chemistry, "Alexandru Ioan Cuza" University of Iasi, 11 Carol Bd., Iasi RO-700506, Romania; [ionelm@uaic.ro](mailto:ionelm@uaic.ro) (I.I.M.)
- \* Correspondence: [aculina.aricu@gmail.com](mailto:aculina.aricu@gmail.com) (A.A.)

## SUPPLEMENTARY INFORMATION

**Table S1. Bond distances (Å) and angles (°) for 20.**

|            |          |            |          |
|------------|----------|------------|----------|
| C4-C14     | 1.528(6) | C5-C6-C7   | 110.2(3) |
| C4-C15     | 1.531(6) | C8-C7-C6   | 112.5(3) |
| C5-C6      | 1.525(4) | O1-C8-C7   | 108.5(3) |
| C5-C10     | 1.559(4) | O1-C8-C9   | 101.2(2) |
| C6-C7      | 1.534(5) | O1-C8-C11  | 107.7(3) |
| C7-C8      | 1.515(5) | C7-C8-C9   | 109.9(3) |
| C8-C9      | 1.562(4) | C7-C8-C11  | 113.8(3) |
| C8-C11     | 1.534(6) | C11-C8-C9  | 114.8(3) |
| C9-C10     | 1.570(5) | C8-C9-C10  | 114.5(2) |
| C9-C16     | 1.544(5) | C16-C9-C8  | 112.3(3) |
| C10-C24    | 1.538(5) | C16-C9-C10 | 112.4(3) |
| C12-C13    | 1.479(7) | C1-C10-C5  | 107.0(3) |
| C16-C17    | 1.513(5) | C1-C10-C9  | 108.2(2) |
| C20-C19    | 1.39     | C5-C10-C9  | 107.4(2) |
| C20-C21    | 1.39     | C24-C10-C1 | 107.9(3) |
| C19-C18    | 1.39     | C24-C10-C5 | 114.3(3) |
| C18-C23    | 1.39     | C24-C10-C9 | 111.8(3) |
| C23-C22    | 1.39     | O1-C12-C13 | 110.8(4) |
| C22-C21    | 1.39     | O2-C12-O1  | 125.0(4) |
| C12-O1-C8  | 122.5(3) | O2-C12-C13 | 124.2(4) |
| C17-N1-C18 | 125.4(8) | C17-C16-C9 | 116.4(3) |

|            |          |             |           |
|------------|----------|-------------|-----------|
| C2-C1-C10  | 113.4(3) | O3-C17-N1   | 122.5(3)  |
| C3-C2-C1   | 111.6(3) | O3-C17-C16  | 122.9(3)  |
| C2-C3-C4   | 114.2(3) | C19-C18-N1  | 114.3(10) |
| C3-C4-C5   | 107.2(3) | C23-C18-N1  | 125.7(10) |
| C14-C4-C3  | 110.7(3) | N1-C17-C16  | 114.4(3)  |
| C14-C4-C5  | 114.6(3) | C20-C19-N2  | 112(2)    |
| C14-C4-C15 | 107.8(3) | C18-C19-N2  | 127(2)    |
| C15-C4-C3  | 107.4(3) | C23-C18-C19 | 120       |
| C15-C4-C5  | 109.0(3) | C18-C23-C22 | 120       |
| C6-C5-C4   | 113.7(2) | C23-C22-C21 | 120       |
| C6-C5-C10  | 110.8(3) | C22-C21-C20 | 120       |
| C10-C5-C4  | 117.3(3) | C18-C19-C20 | 120       |
|            |          | C19-C20-C21 | 120       |

**Table S2. Selected crystallographic data refinement parameters for 20.**

|                                                 |                                                  |
|-------------------------------------------------|--------------------------------------------------|
| Formula                                         | $\text{C}_{24}\text{H}_{36}\text{N}_2\text{O}_3$ |
| <i>F</i> <sub>w</sub>                           | 400.55                                           |
| Space group                                     | <i>P</i> 2 <sub>1</sub>                          |
| <i>a</i> [Å]                                    | 8.2121(3)                                        |
| <i>b</i> [Å]                                    | 9.6498(3)                                        |
| <i>c</i> [Å]                                    | 14.9502(5)                                       |
| $\alpha$ [°]                                    | 90                                               |
| $\beta$ [°]                                     | 105.745(4)                                       |
| $\gamma$ [°]                                    | 90                                               |
| <i>V</i> [Å <sup>3</sup> ]                      | 1140.28(7)                                       |
| <i>Z</i>                                        | 2                                                |
| <i>r</i> <sub>calcd</sub> [g cm <sup>-3</sup> ] | 1.167                                            |
| Crystal size [mm]                               | 0.35×0.15×0.10                                   |
| <i>T</i> [K]                                    | 294                                              |
| $\mu$ [mm <sup>-1</sup> ]                       | 0.076                                            |
| 2 $\theta$ range [°]                            | 5.082 to 52.744                                  |
| Ref. collected                                  | 14240                                            |
| Indep.refl. <i>R</i> <sub>int</sub>             | 4447, 0.0248                                     |
| Data/restr./param.                              | 4447/2/253                                       |
| <i>R</i> <sub>1</sub>                           | 0.0578                                           |
| <i>wR</i> <sub>2</sub>                          | 0.1573                                           |
| GOF                                             | 1.036                                            |
| CCDC                                            | 2225381                                          |

<sup>1</sup>H NMR spectrum of compound 4

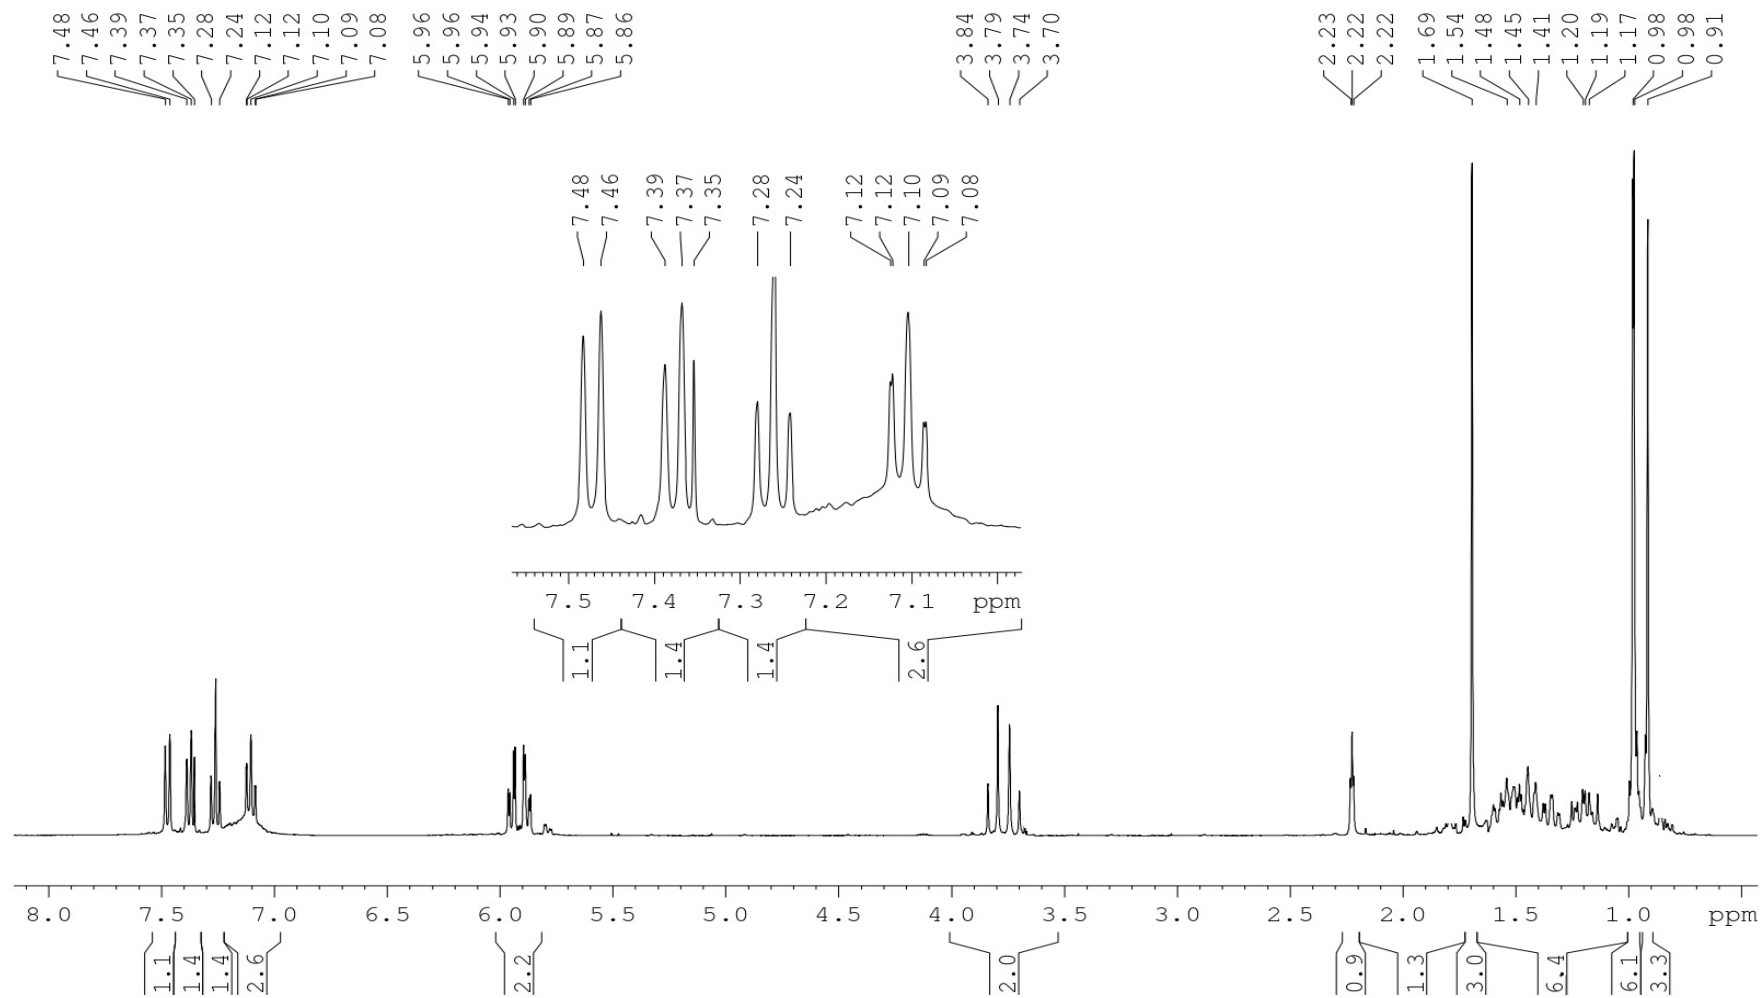

<sup>13</sup>C NMR spectrum of compound 4

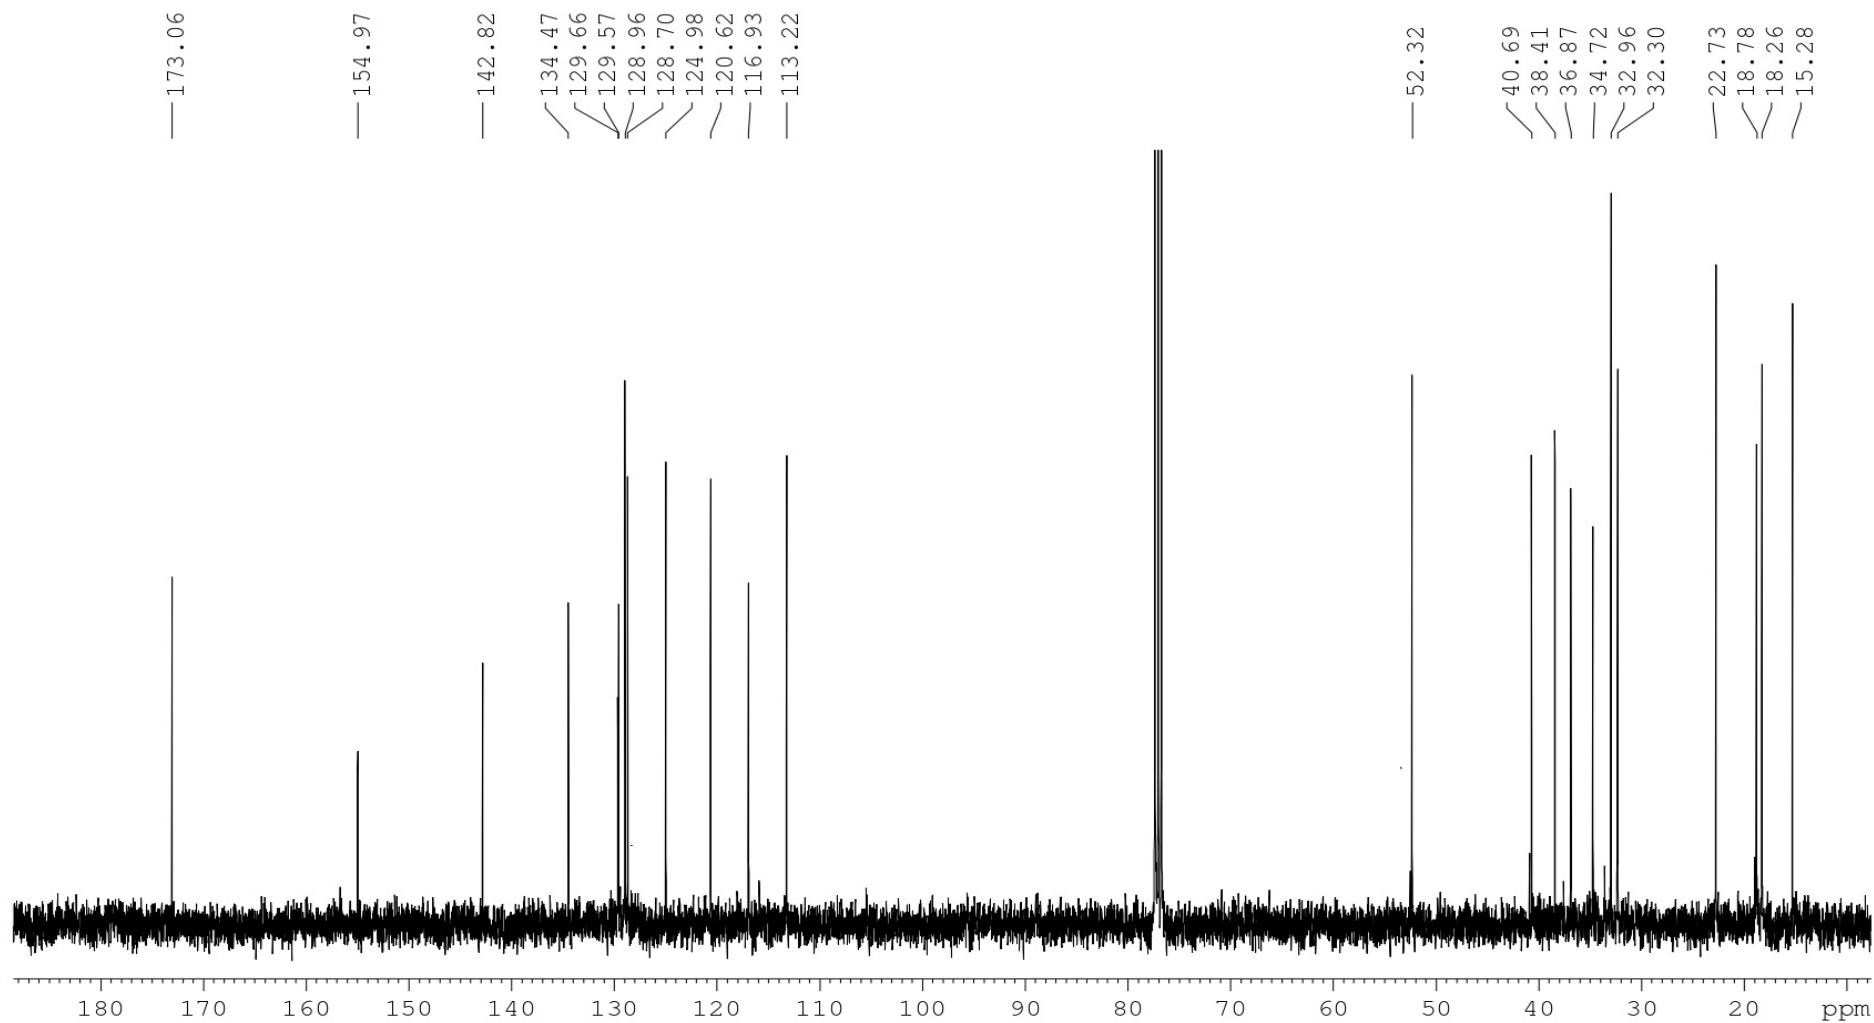

<sup>1</sup>H NMR spectrum of compound 7

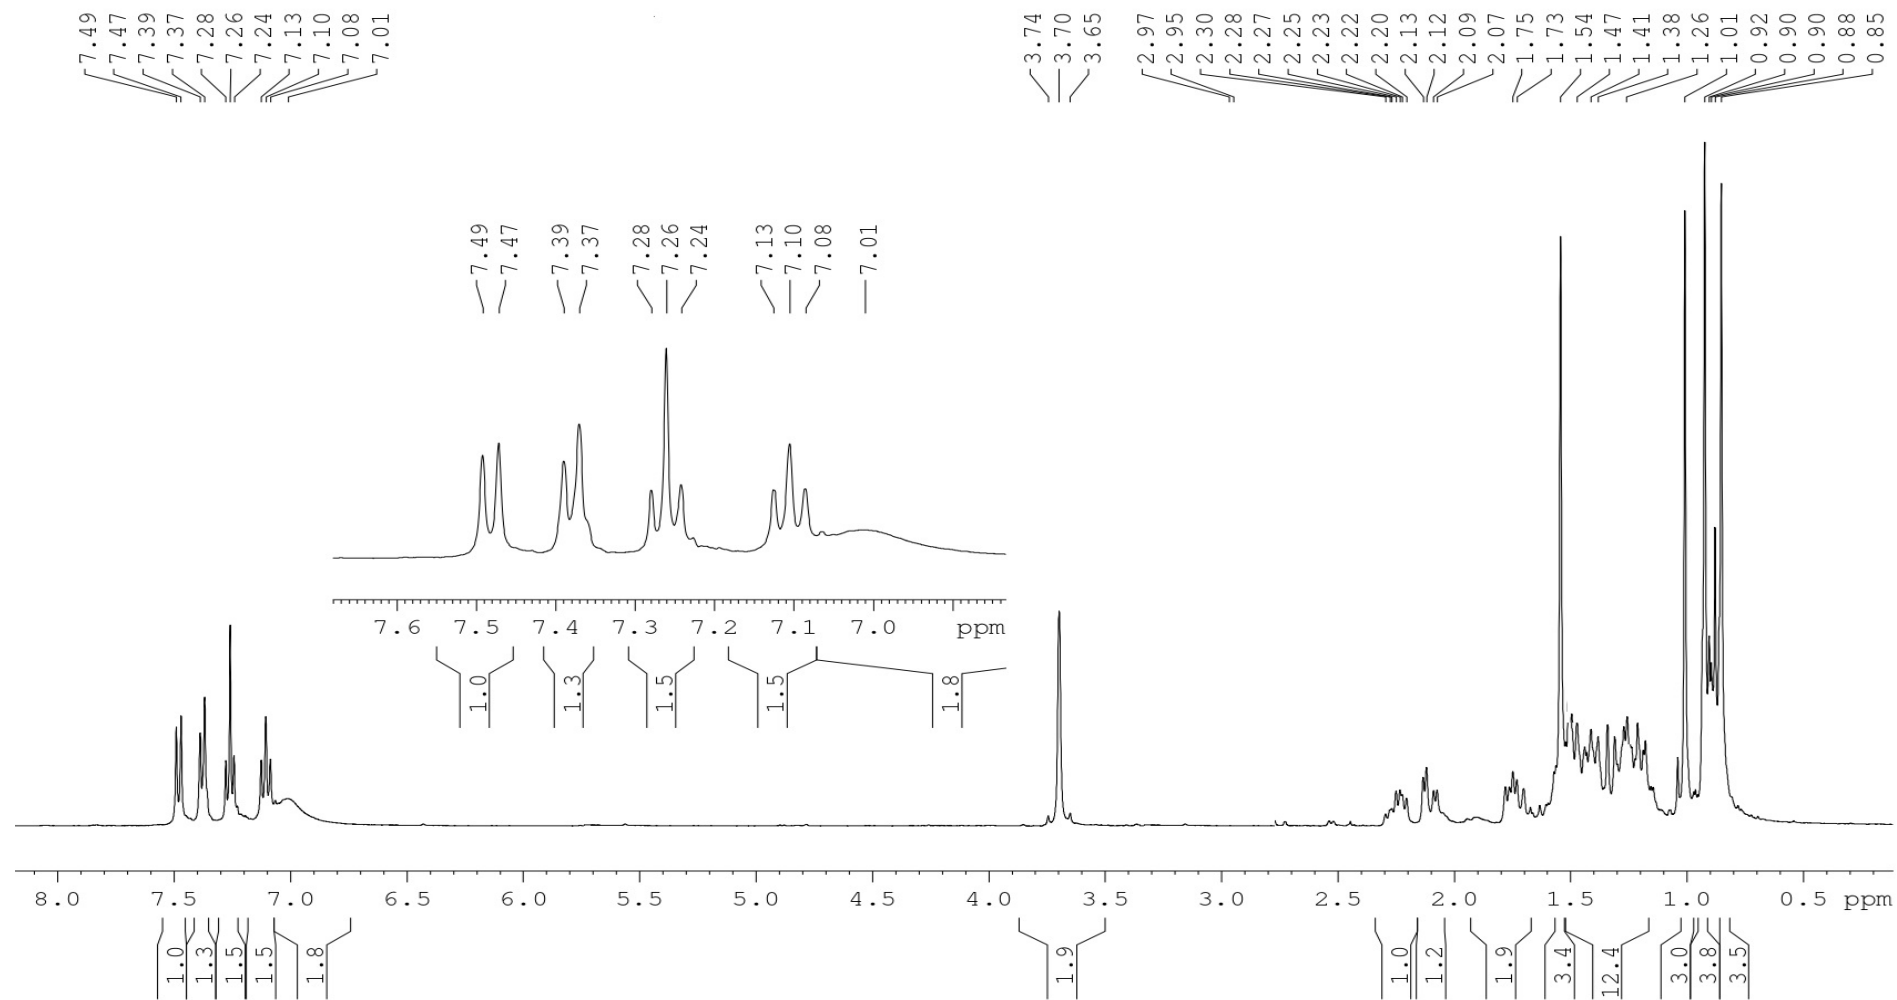

<sup>13</sup>C NMR spectrum of compound 7

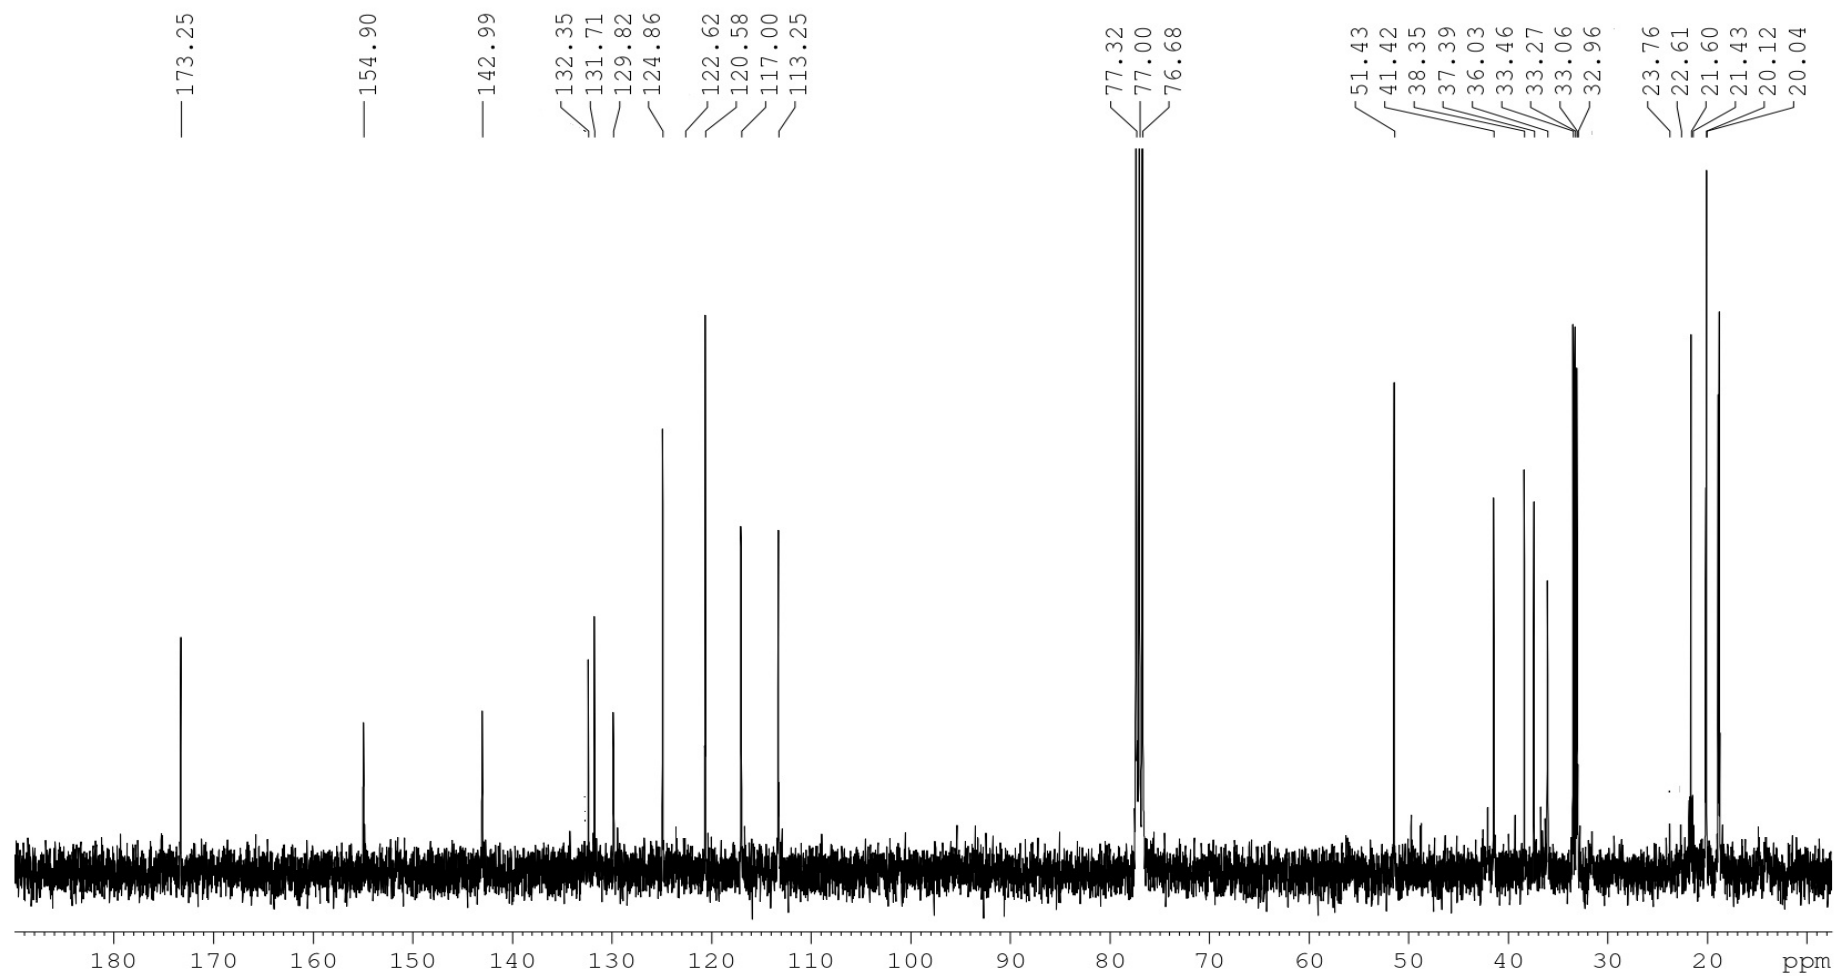

<sup>1</sup>H NMR spectrum of compound 10

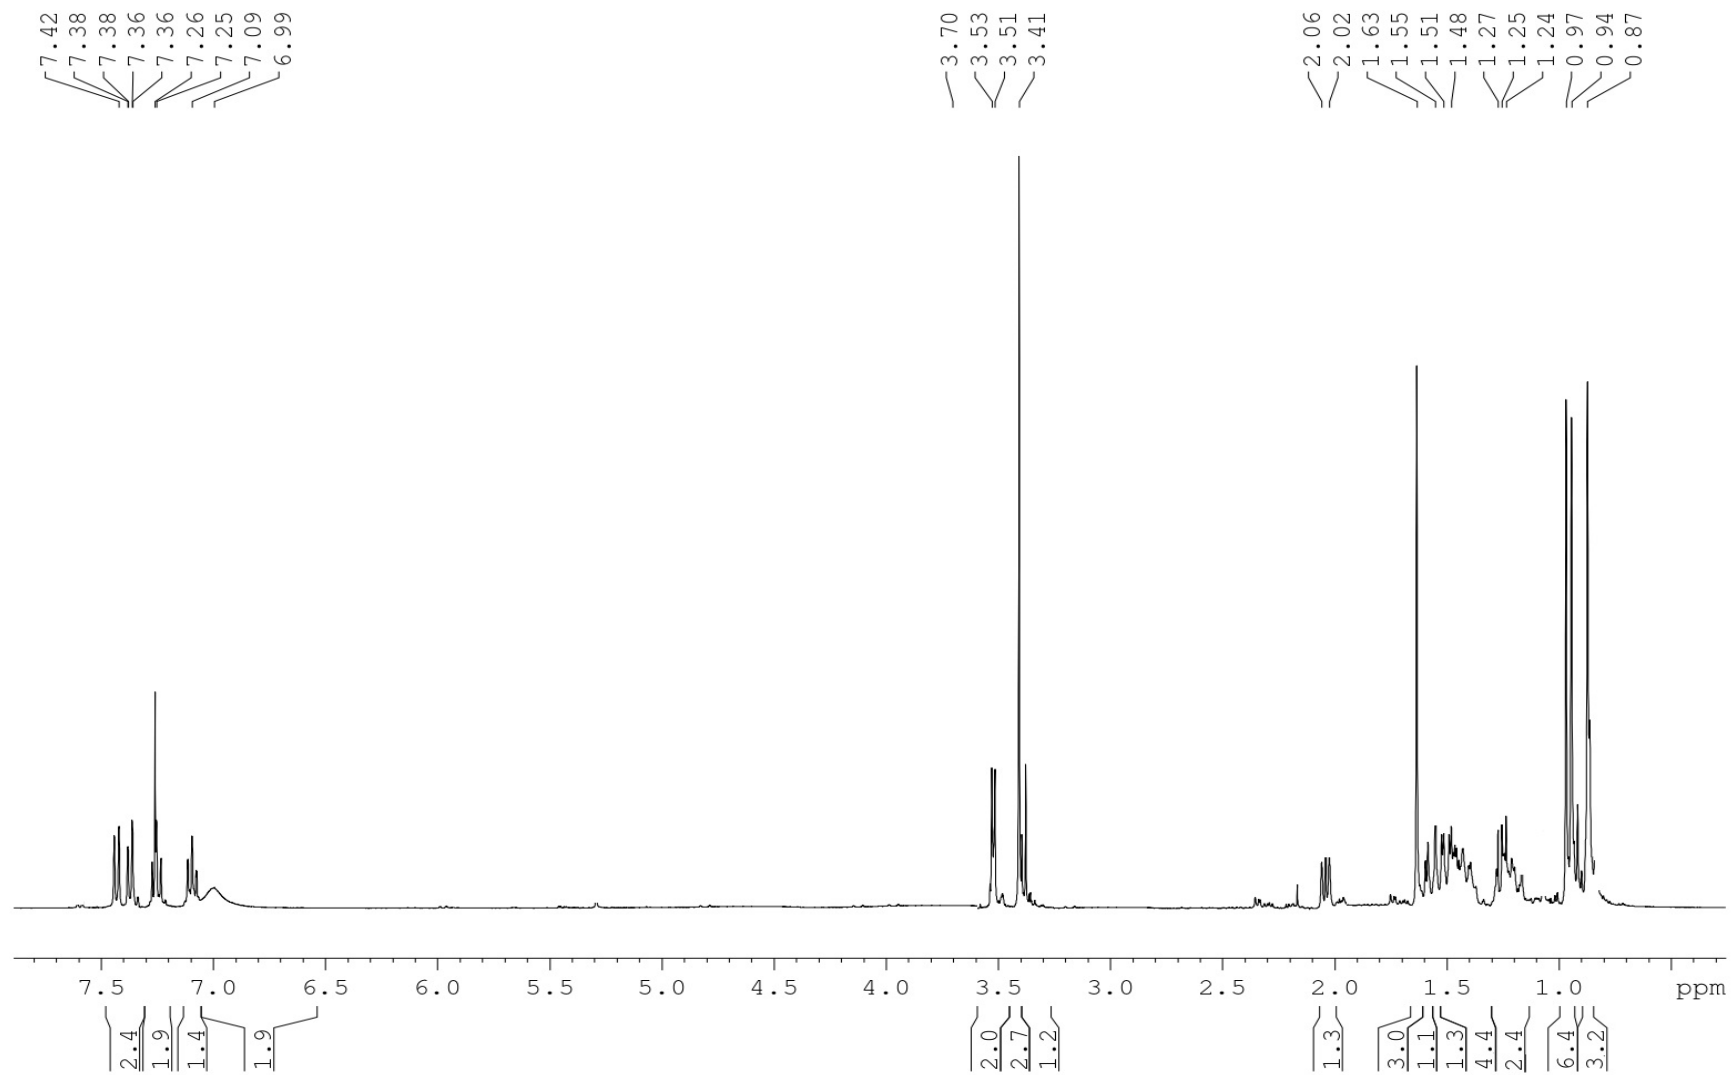

<sup>13</sup>C NMR spectrum of compound 10

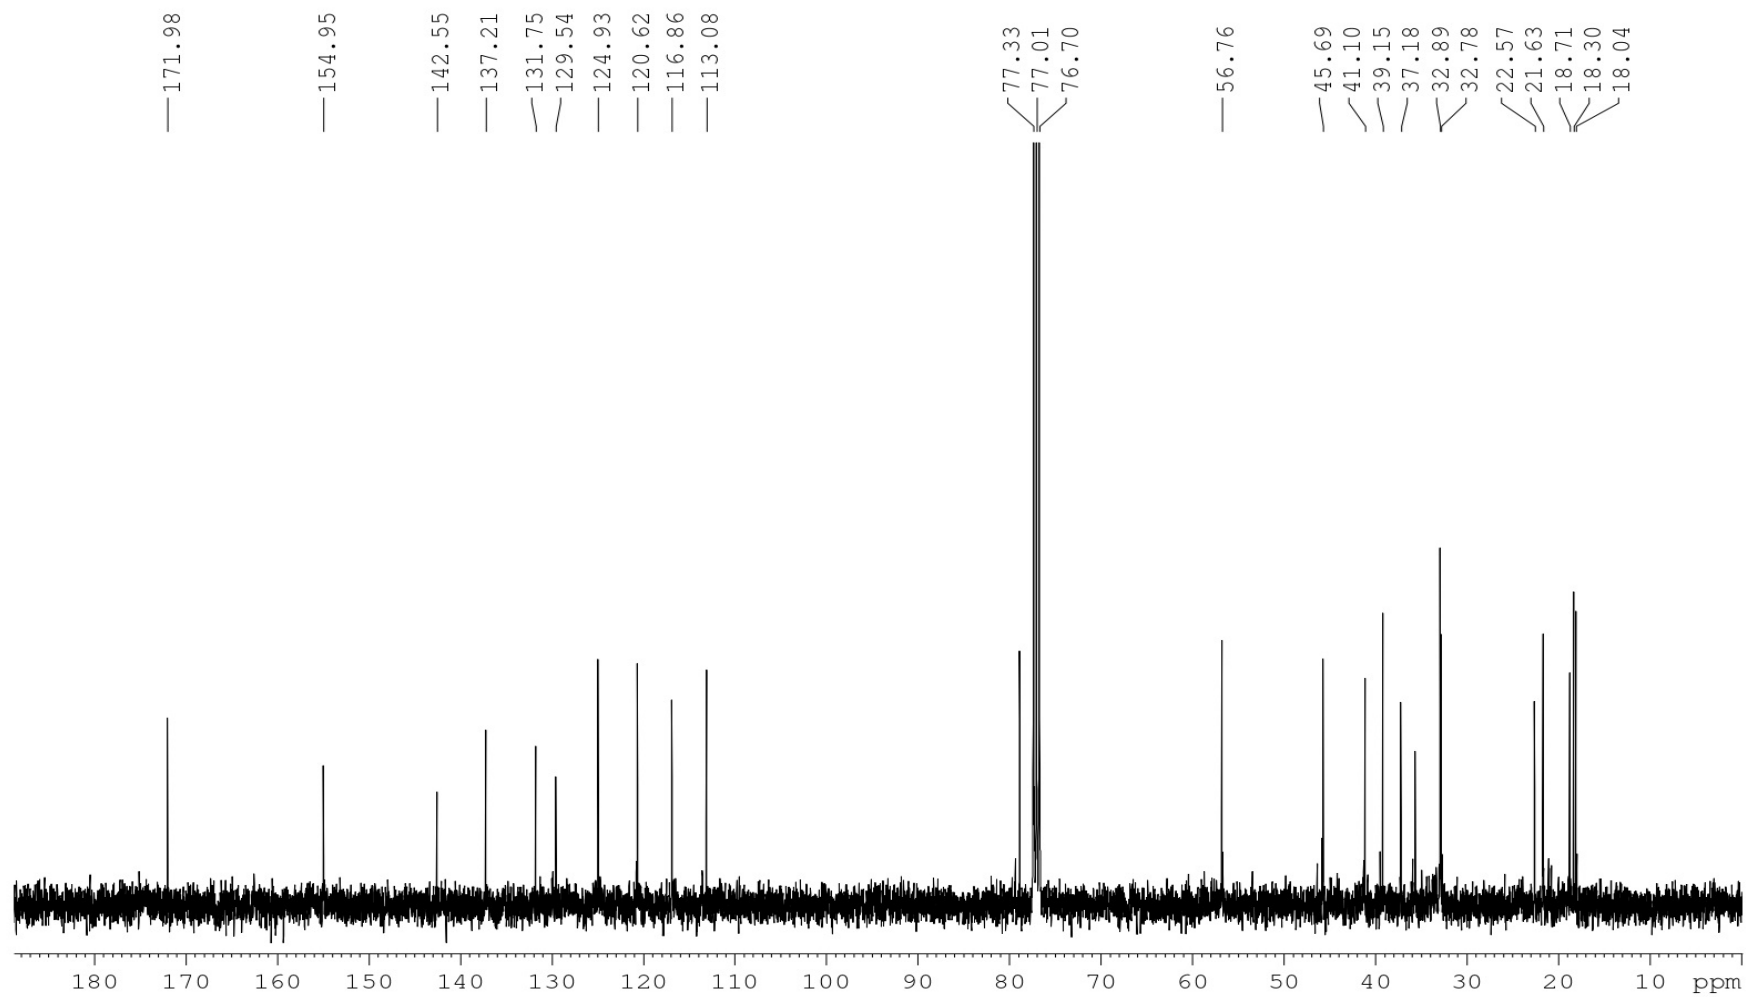



<sup>1</sup>H NMR spectrum of compound 14

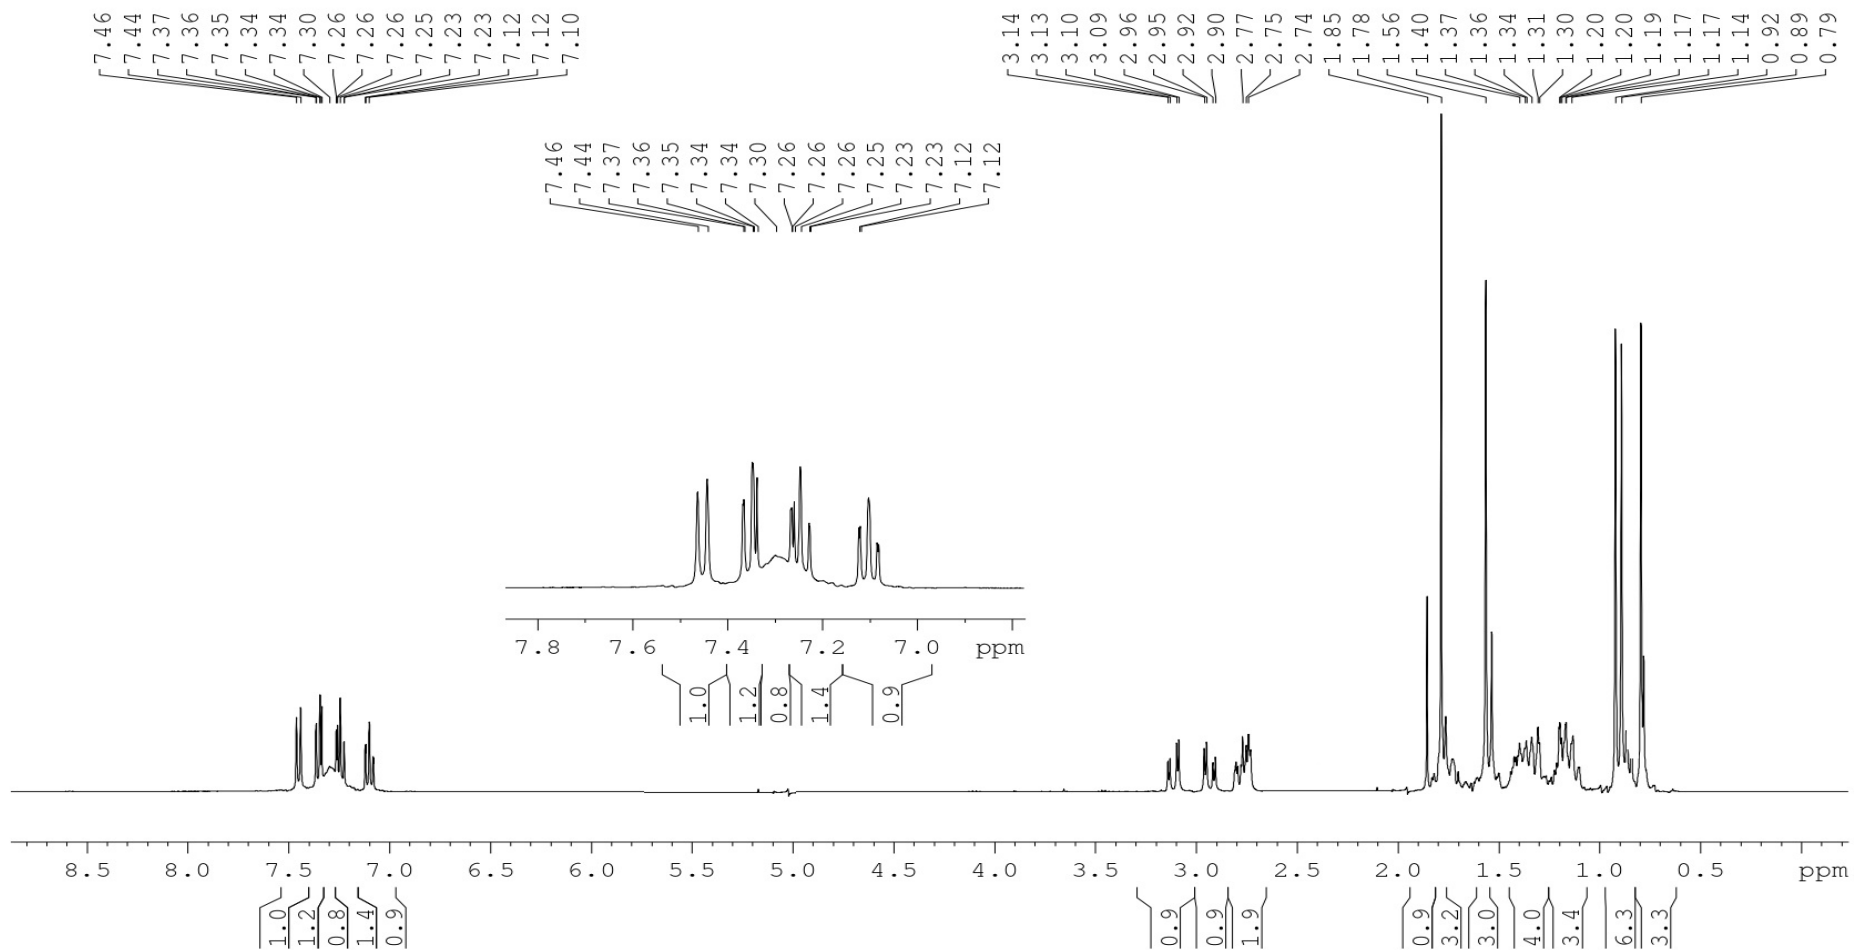

<sup>13</sup>C NMR spectrum of compound 14

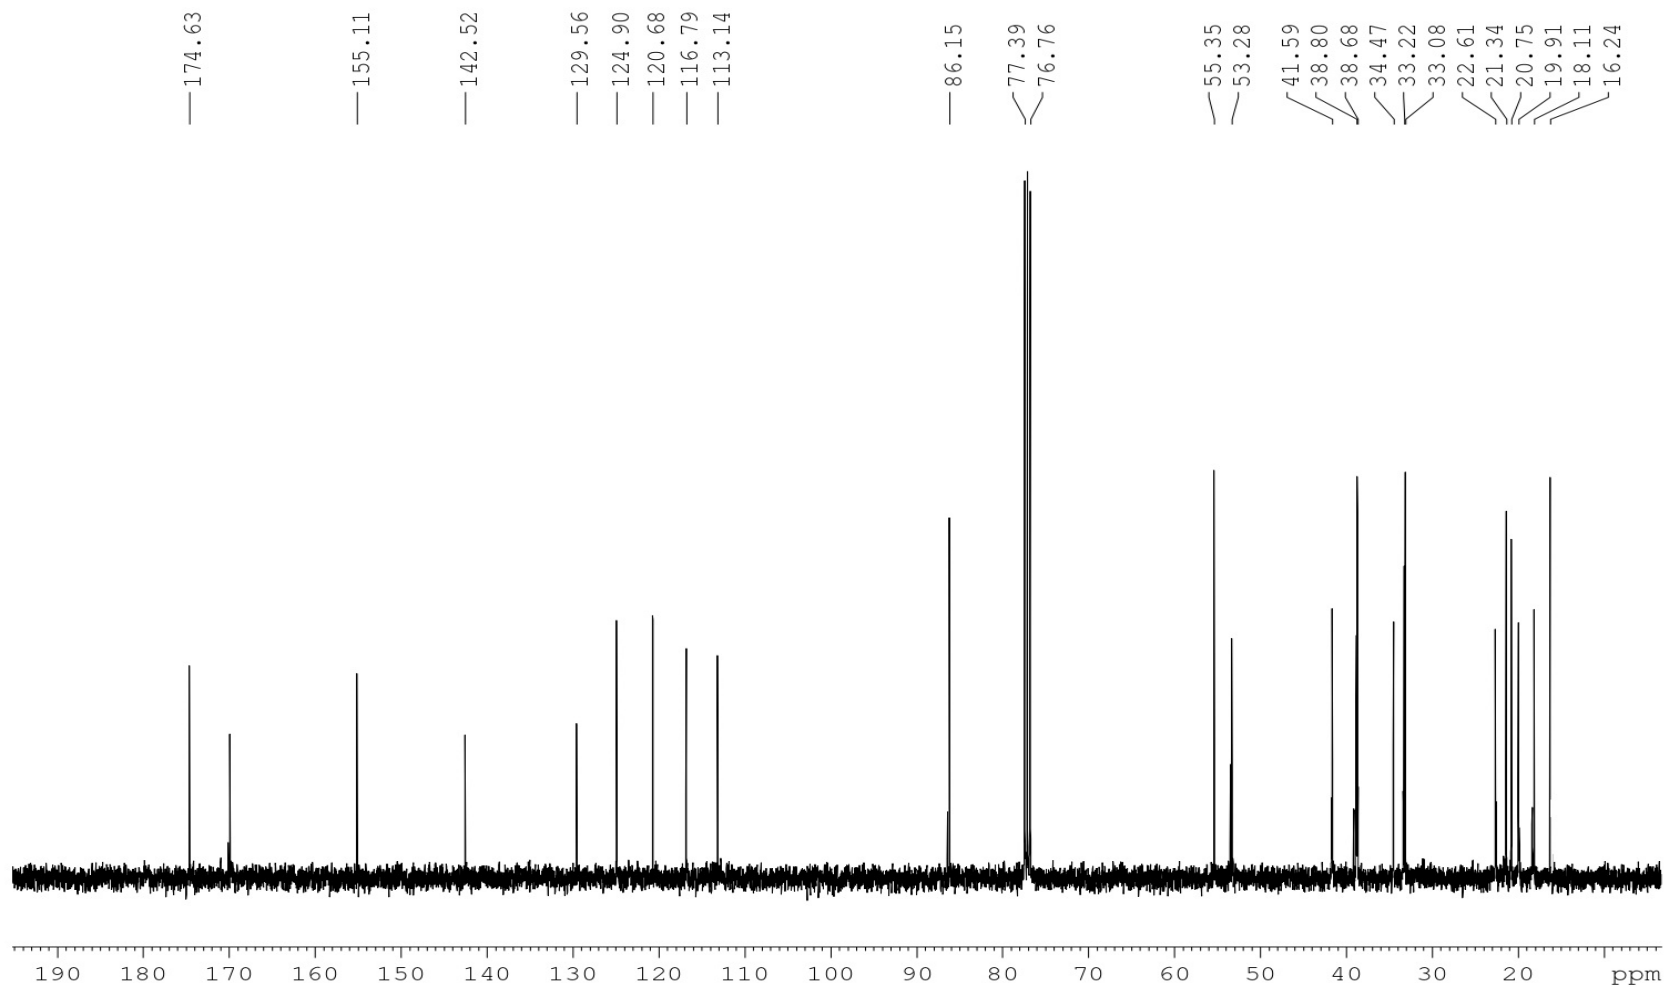

<sup>1</sup>H NMR spectrum of compound 15

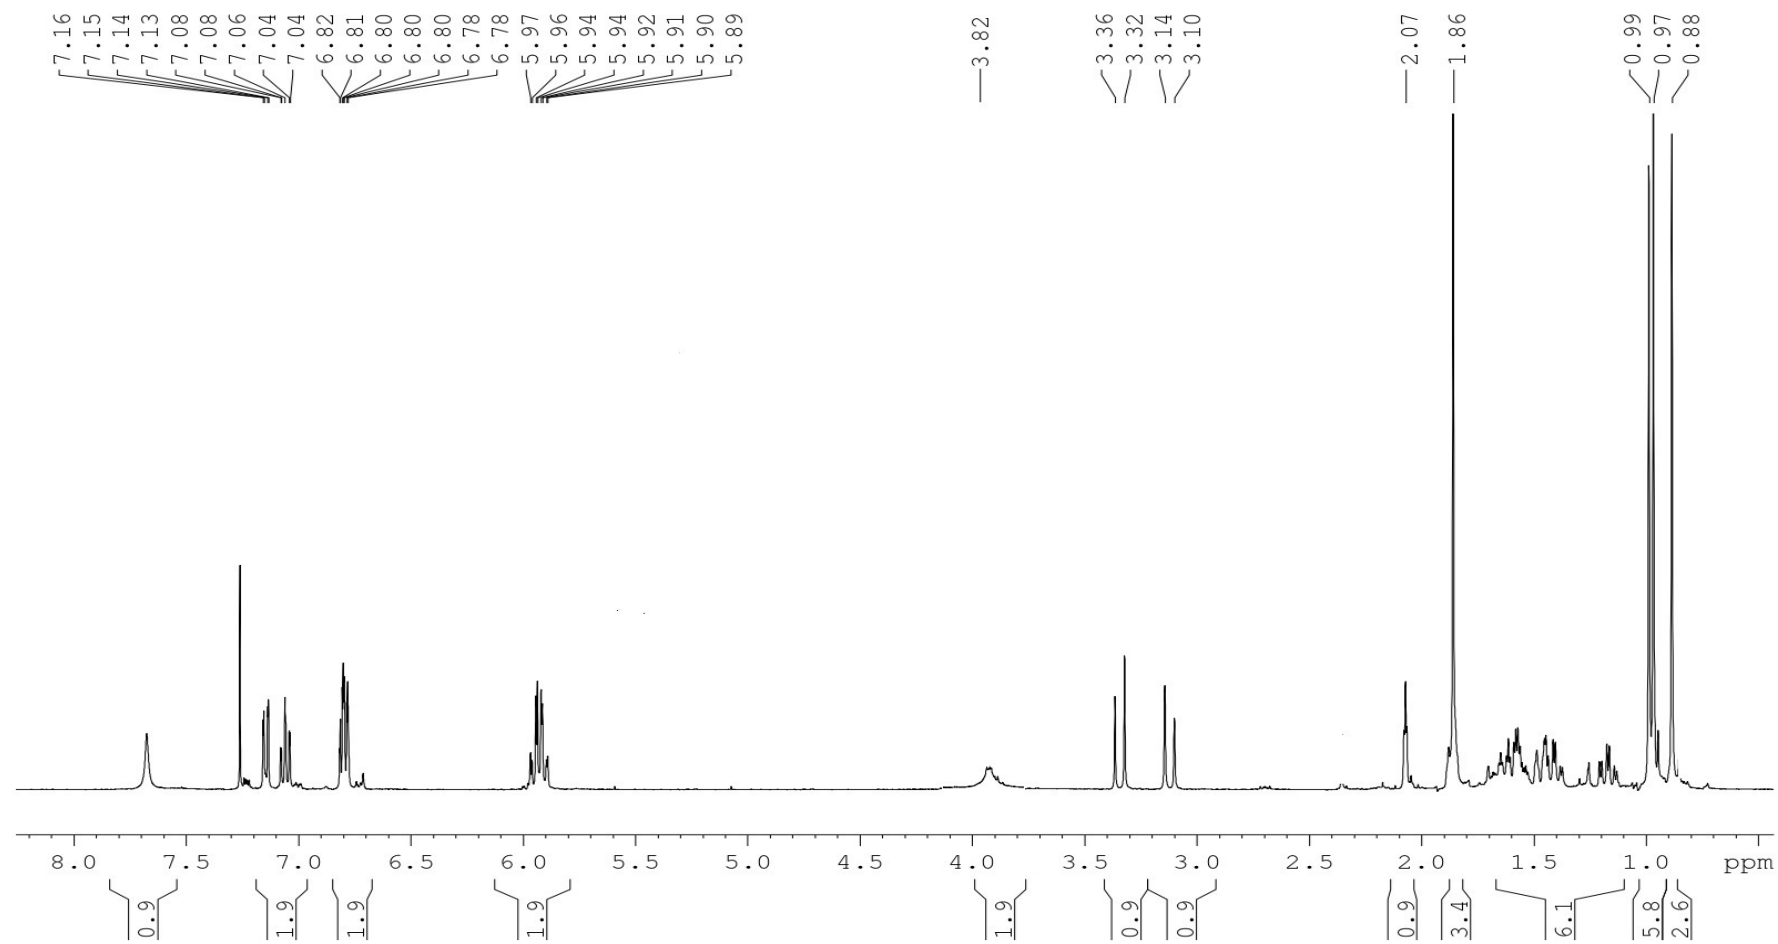

<sup>13</sup>C NMR spectrum of compound 15

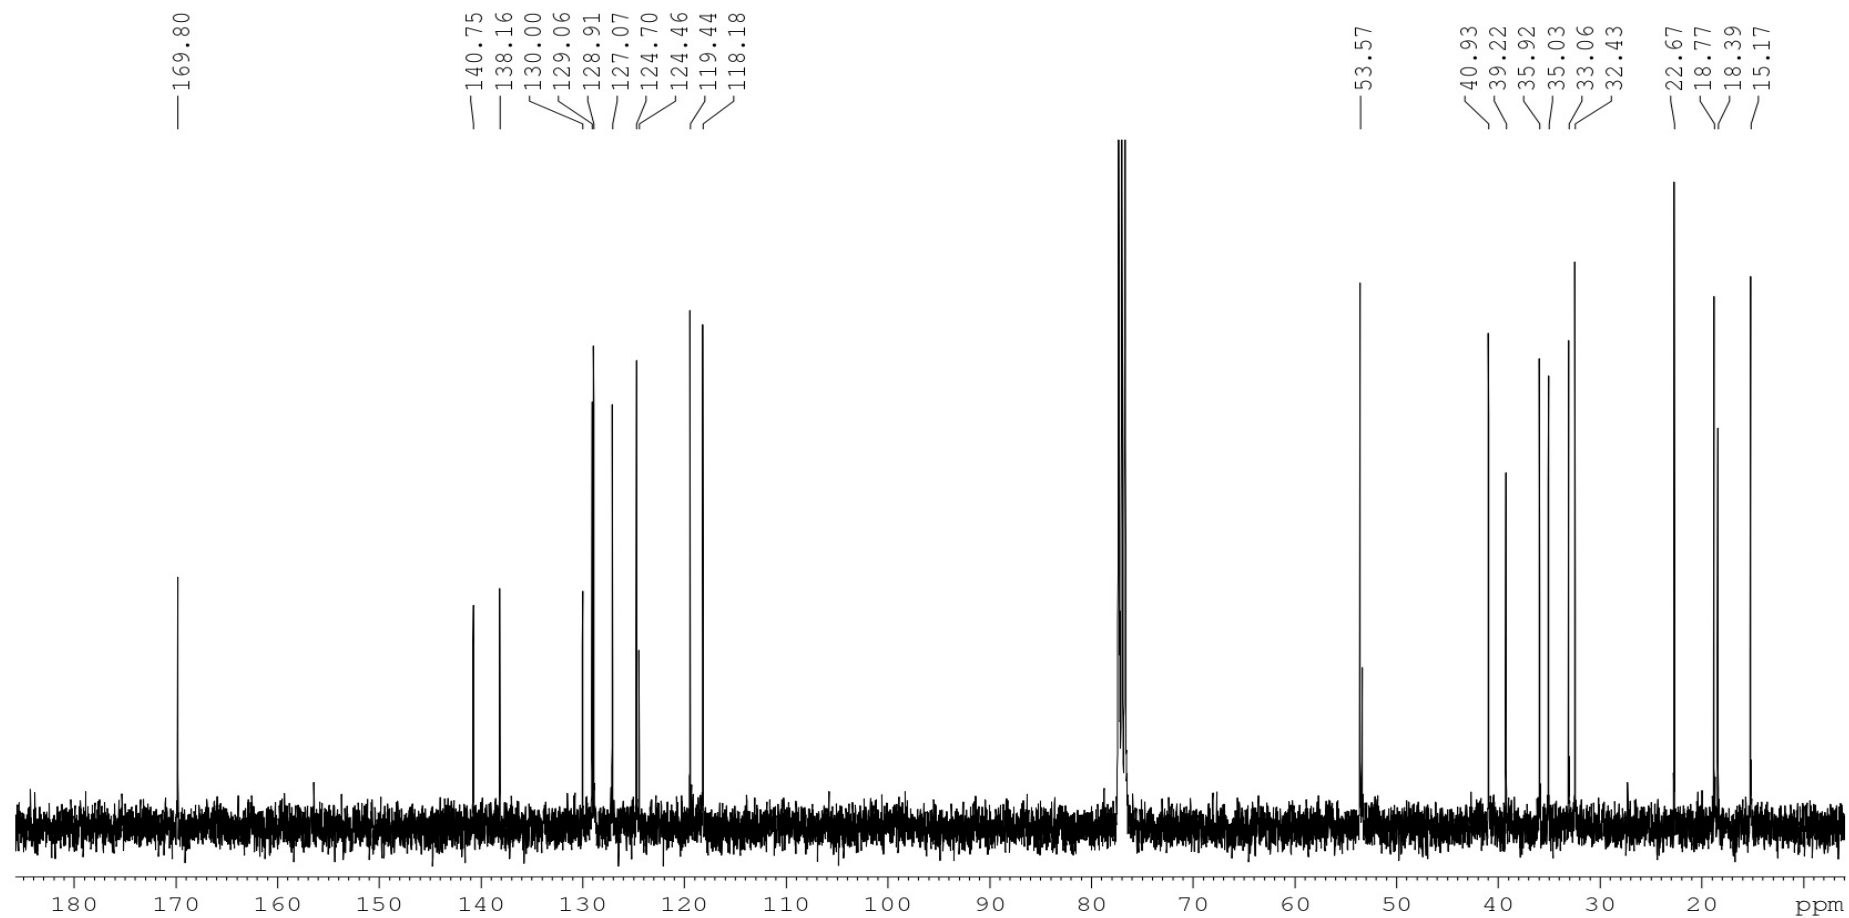

<sup>1</sup>H NMR spectrum of compound 16

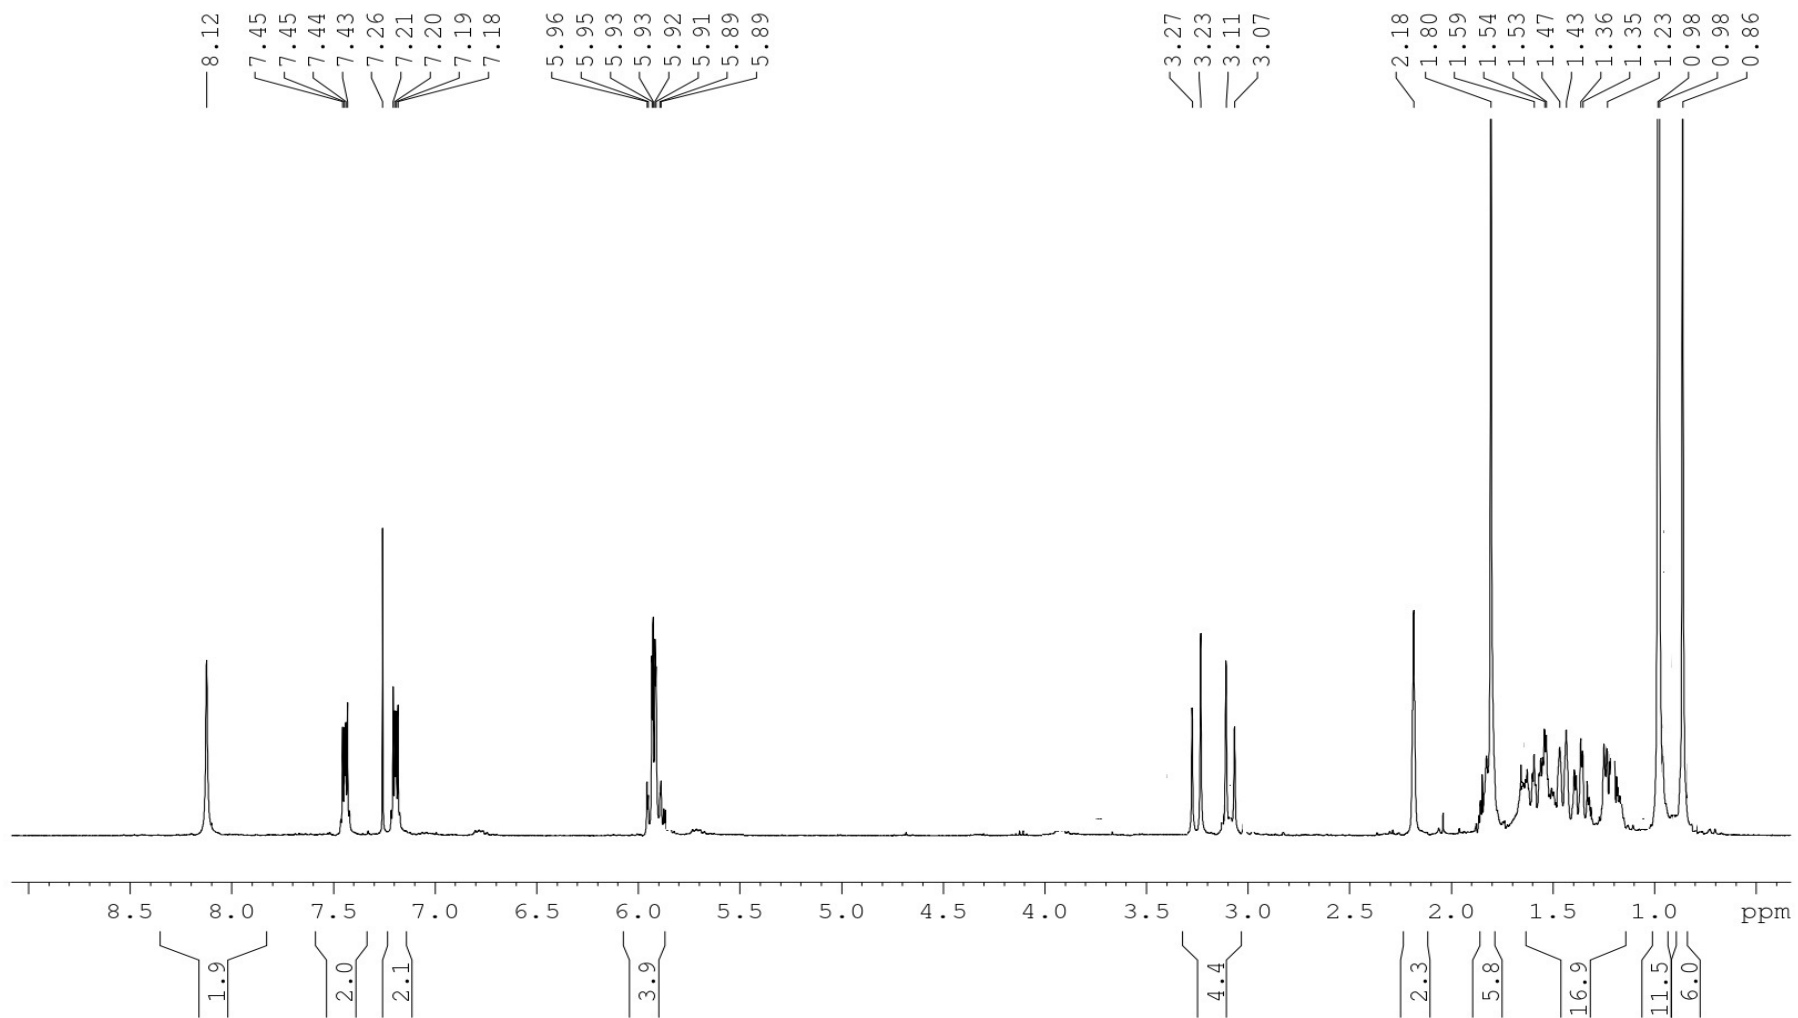

$^{13}\text{C}$  NMR spectrum of compound 16

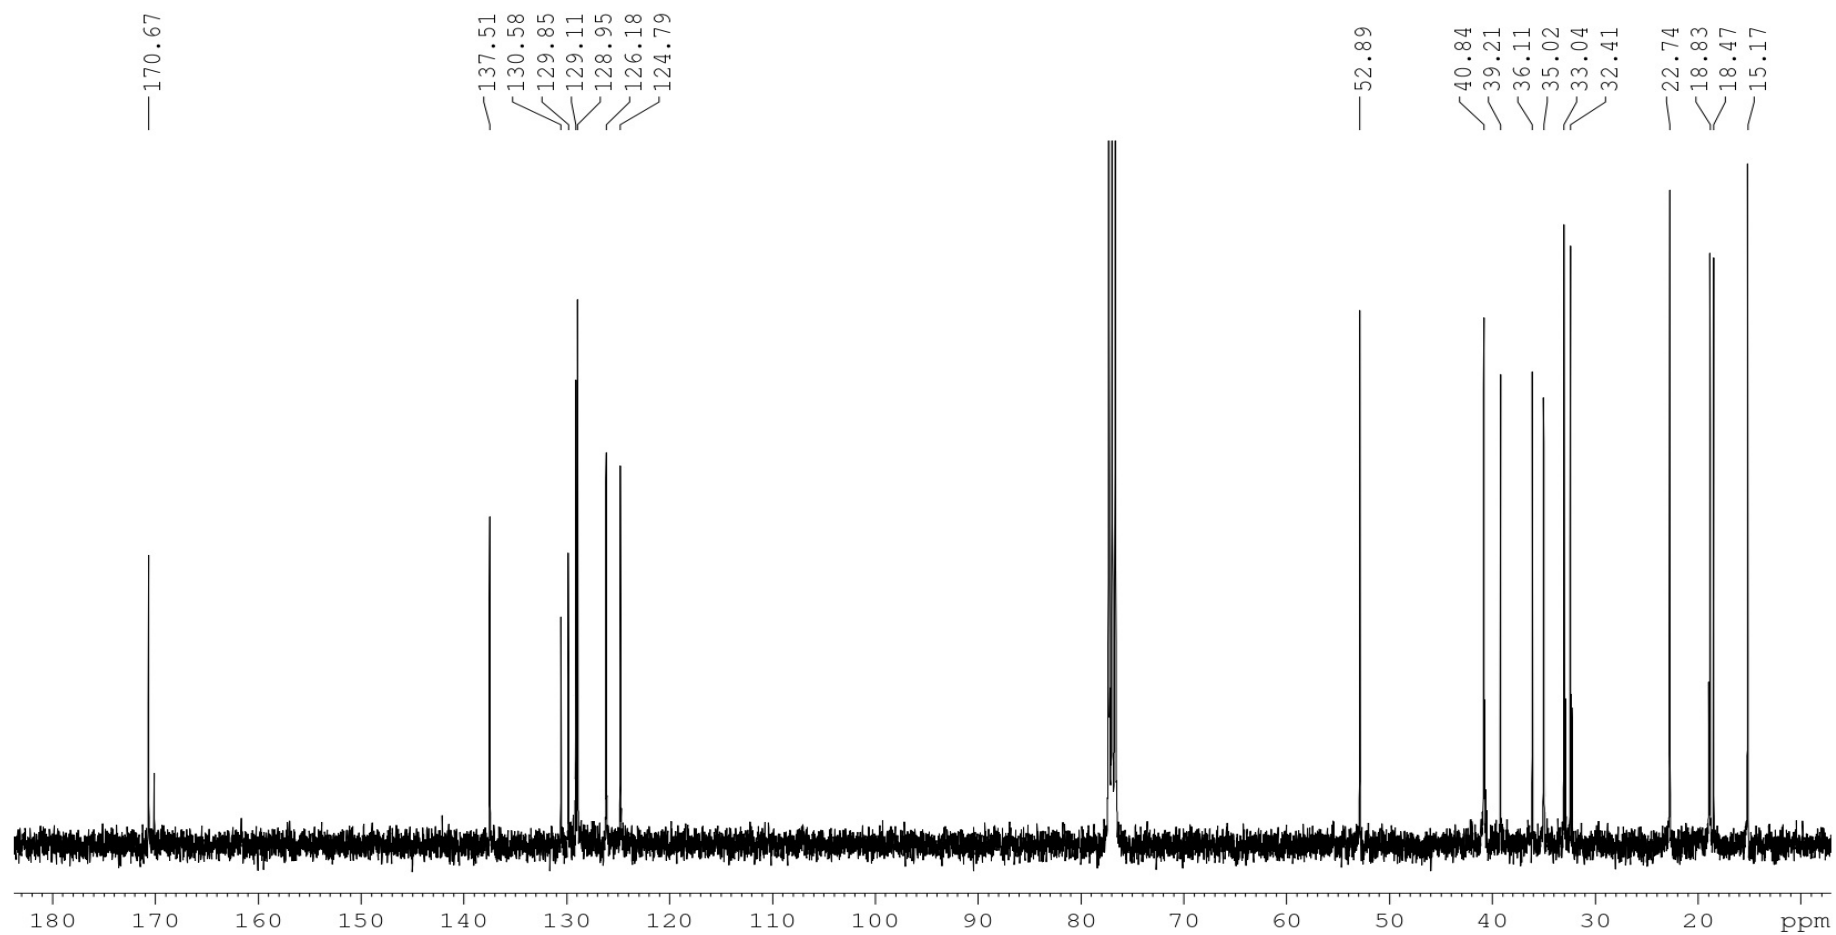

<sup>1</sup>H NMR spectrum of compound 18

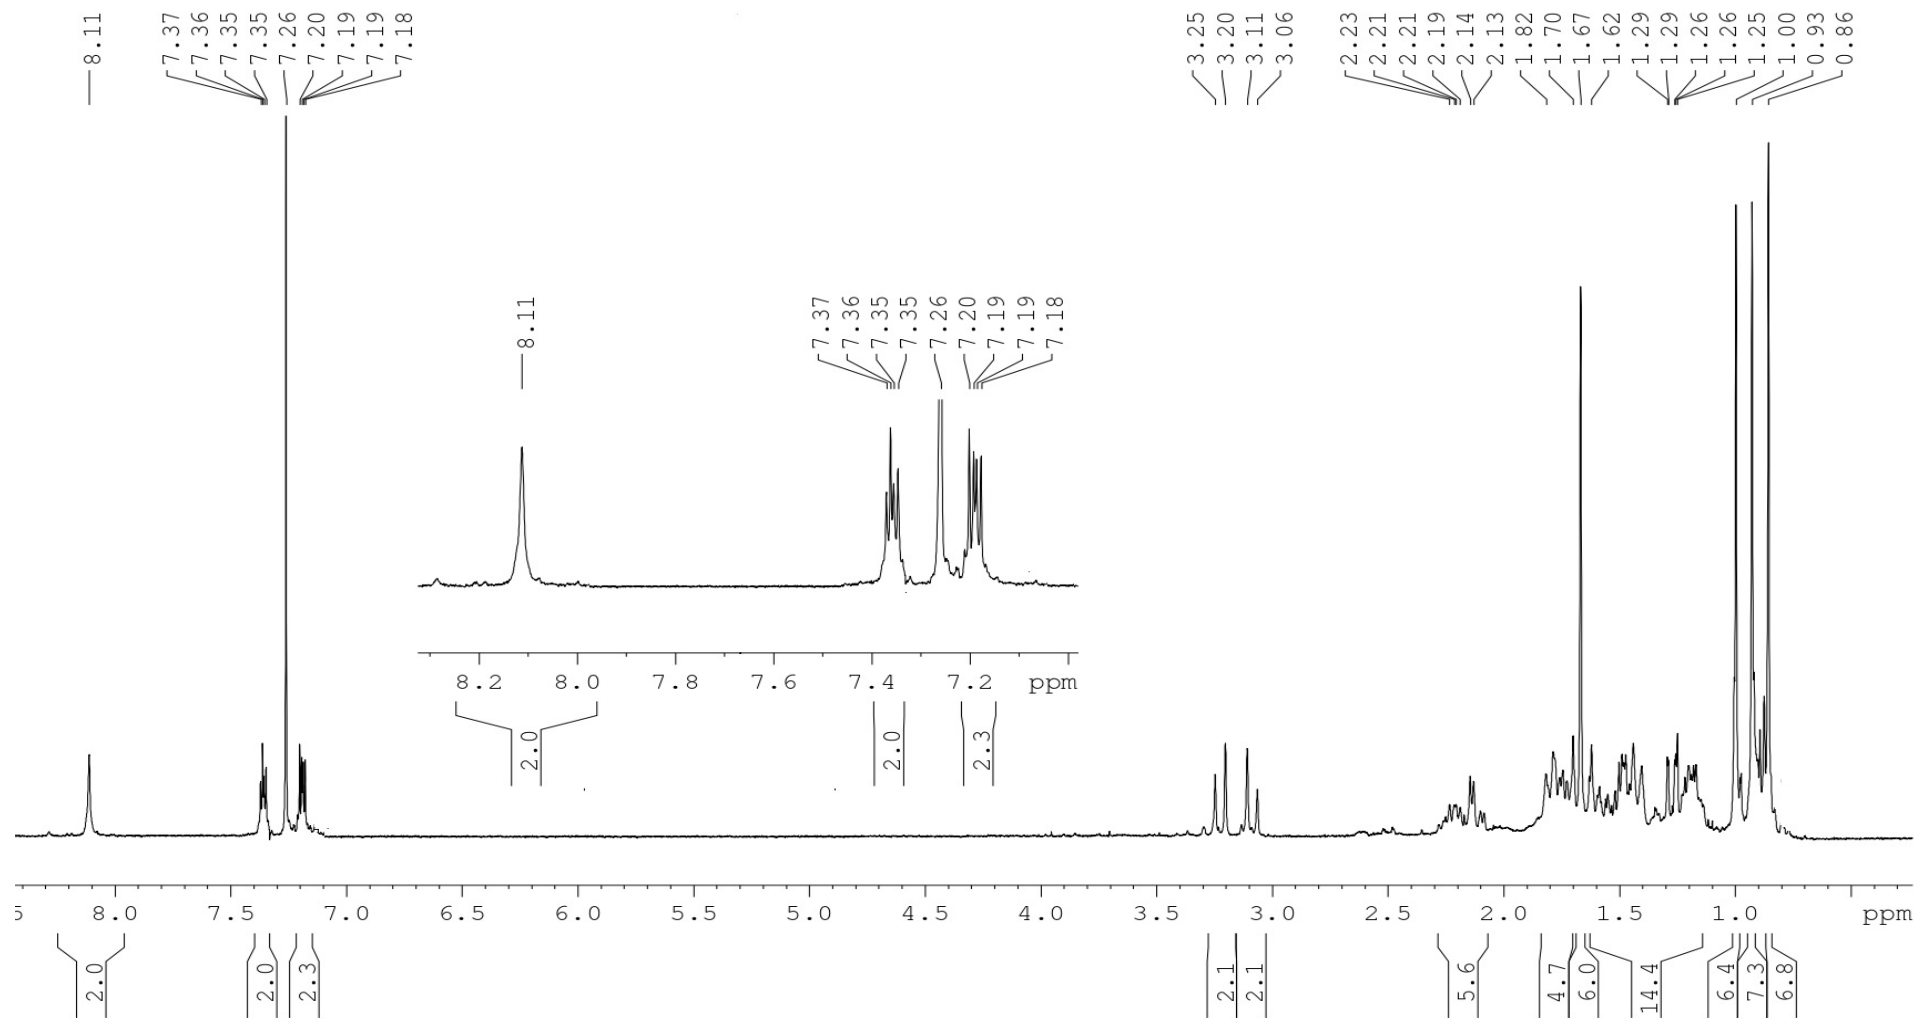

<sup>13</sup>C NMR spectrum of compound 18

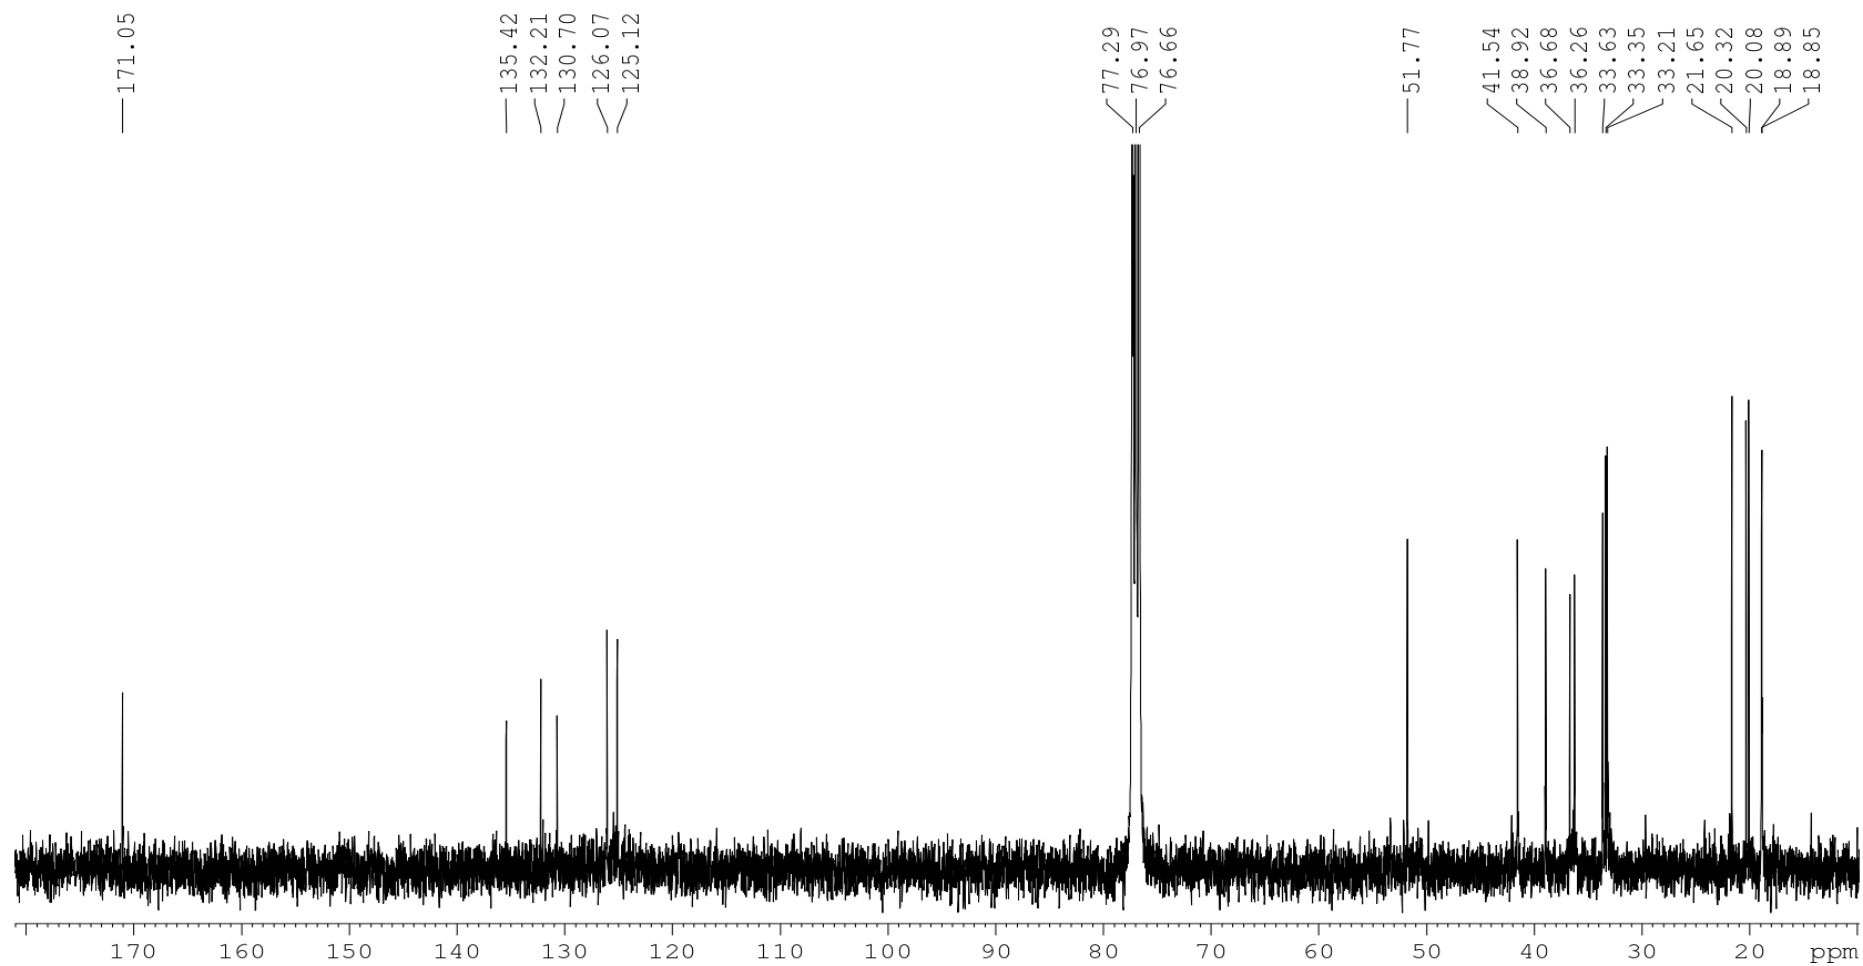



<sup>1</sup>H NMR spectrum of compound 19

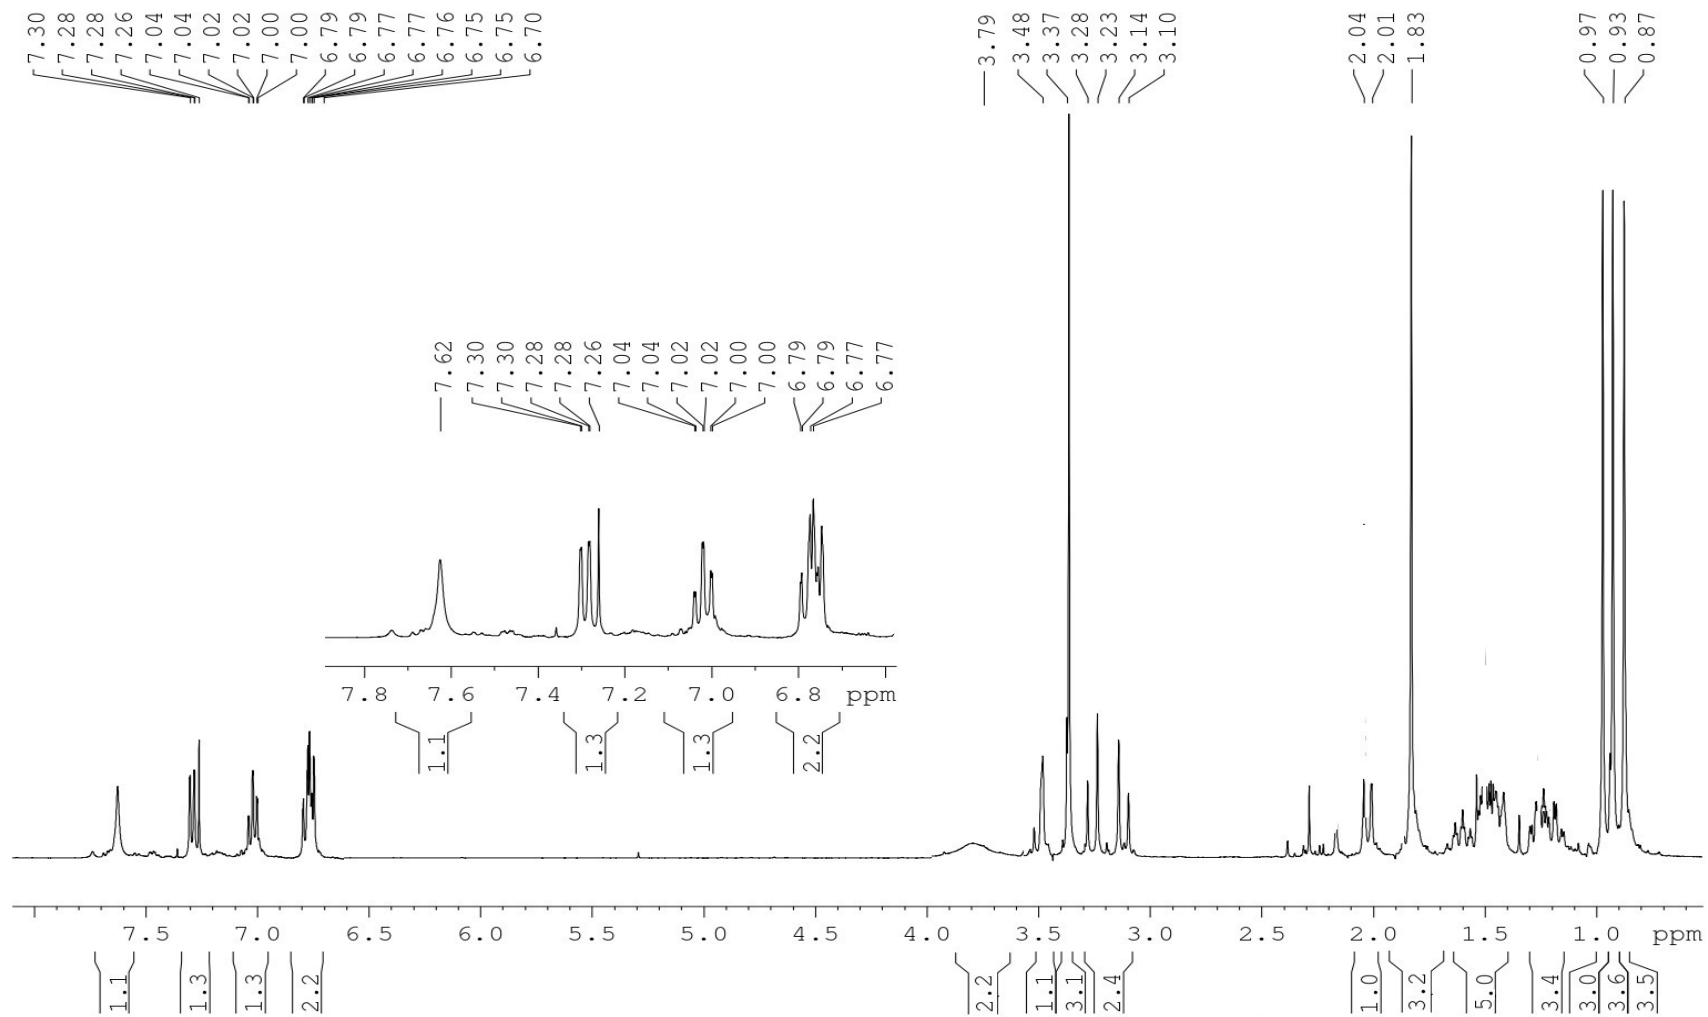

<sup>13</sup>C NMR spectrum of compound 19

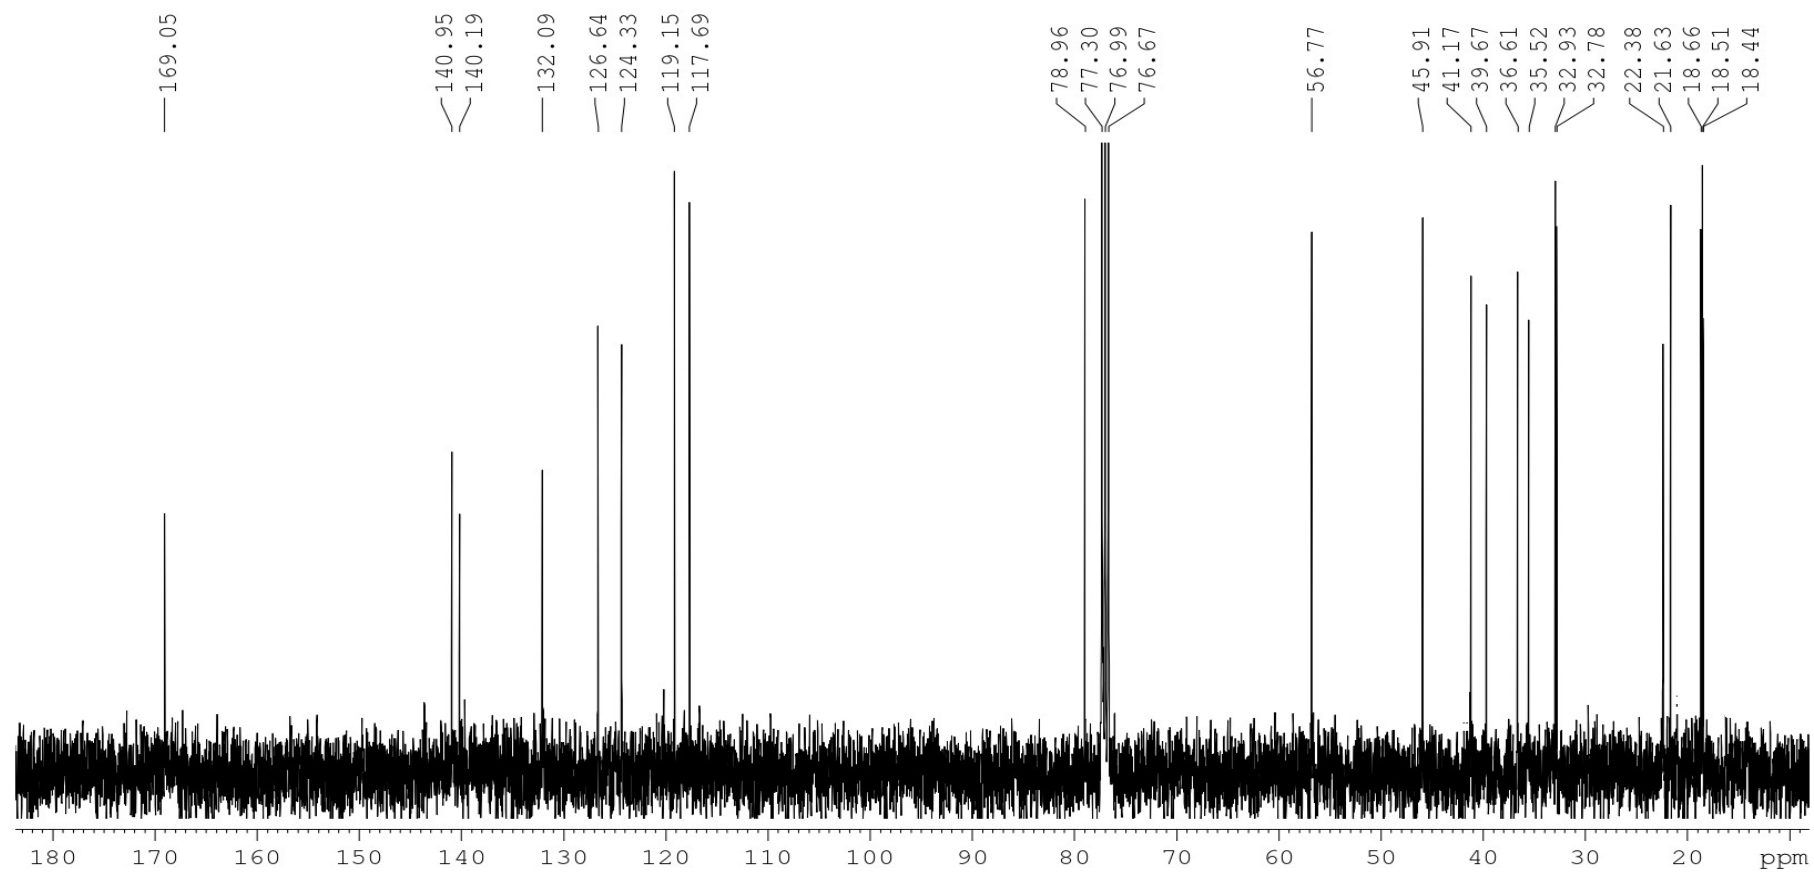

<sup>1</sup>H NMR spectrum of compound 20

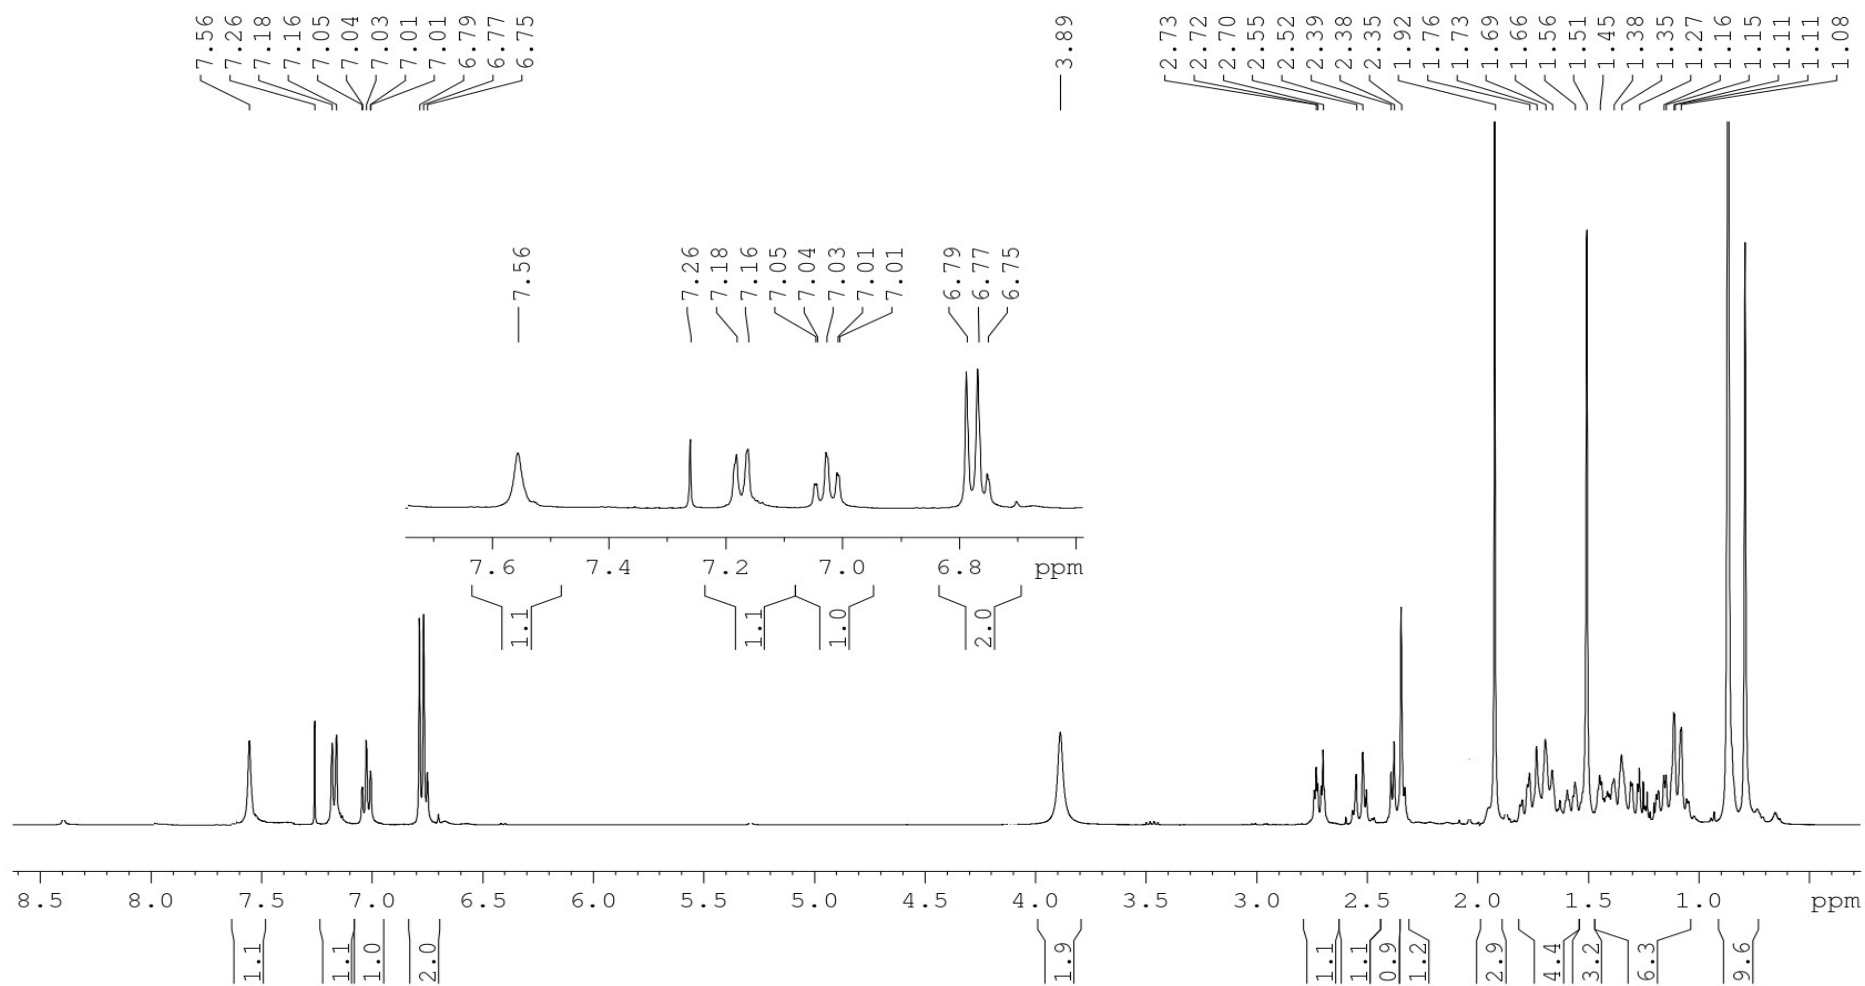

<sup>13</sup>C NMR spectrum of compound 20

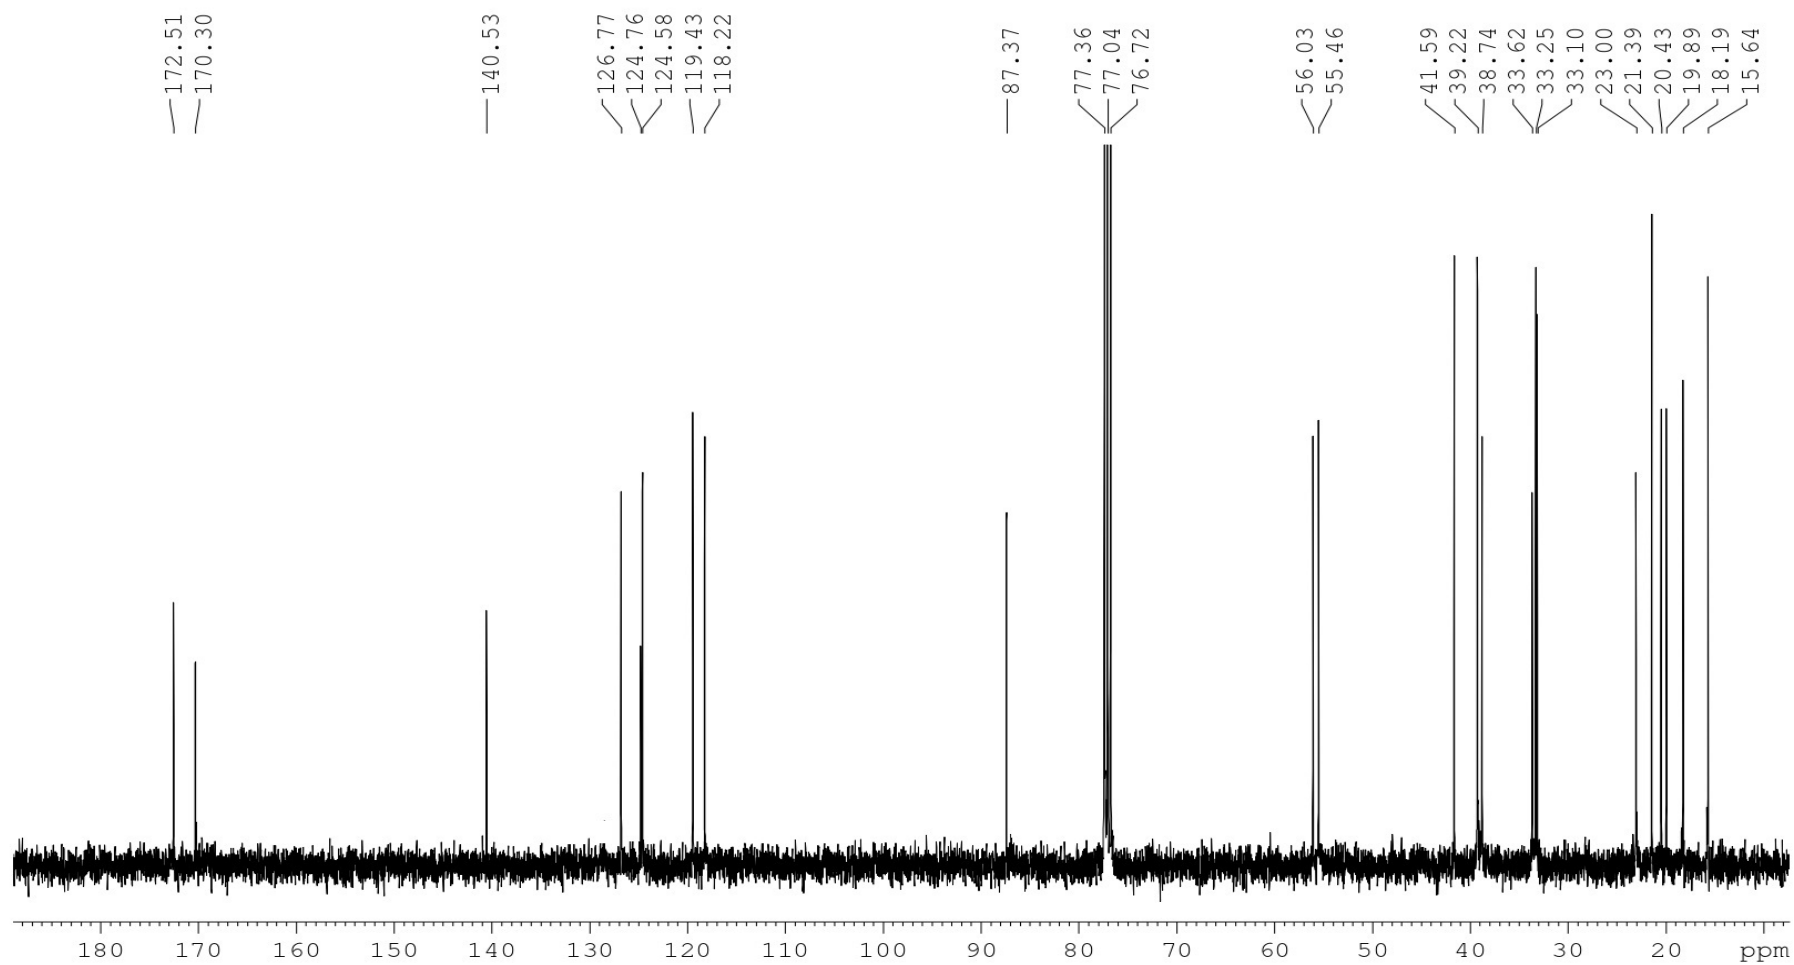

<sup>1</sup>H NMR spectrum of compound 21

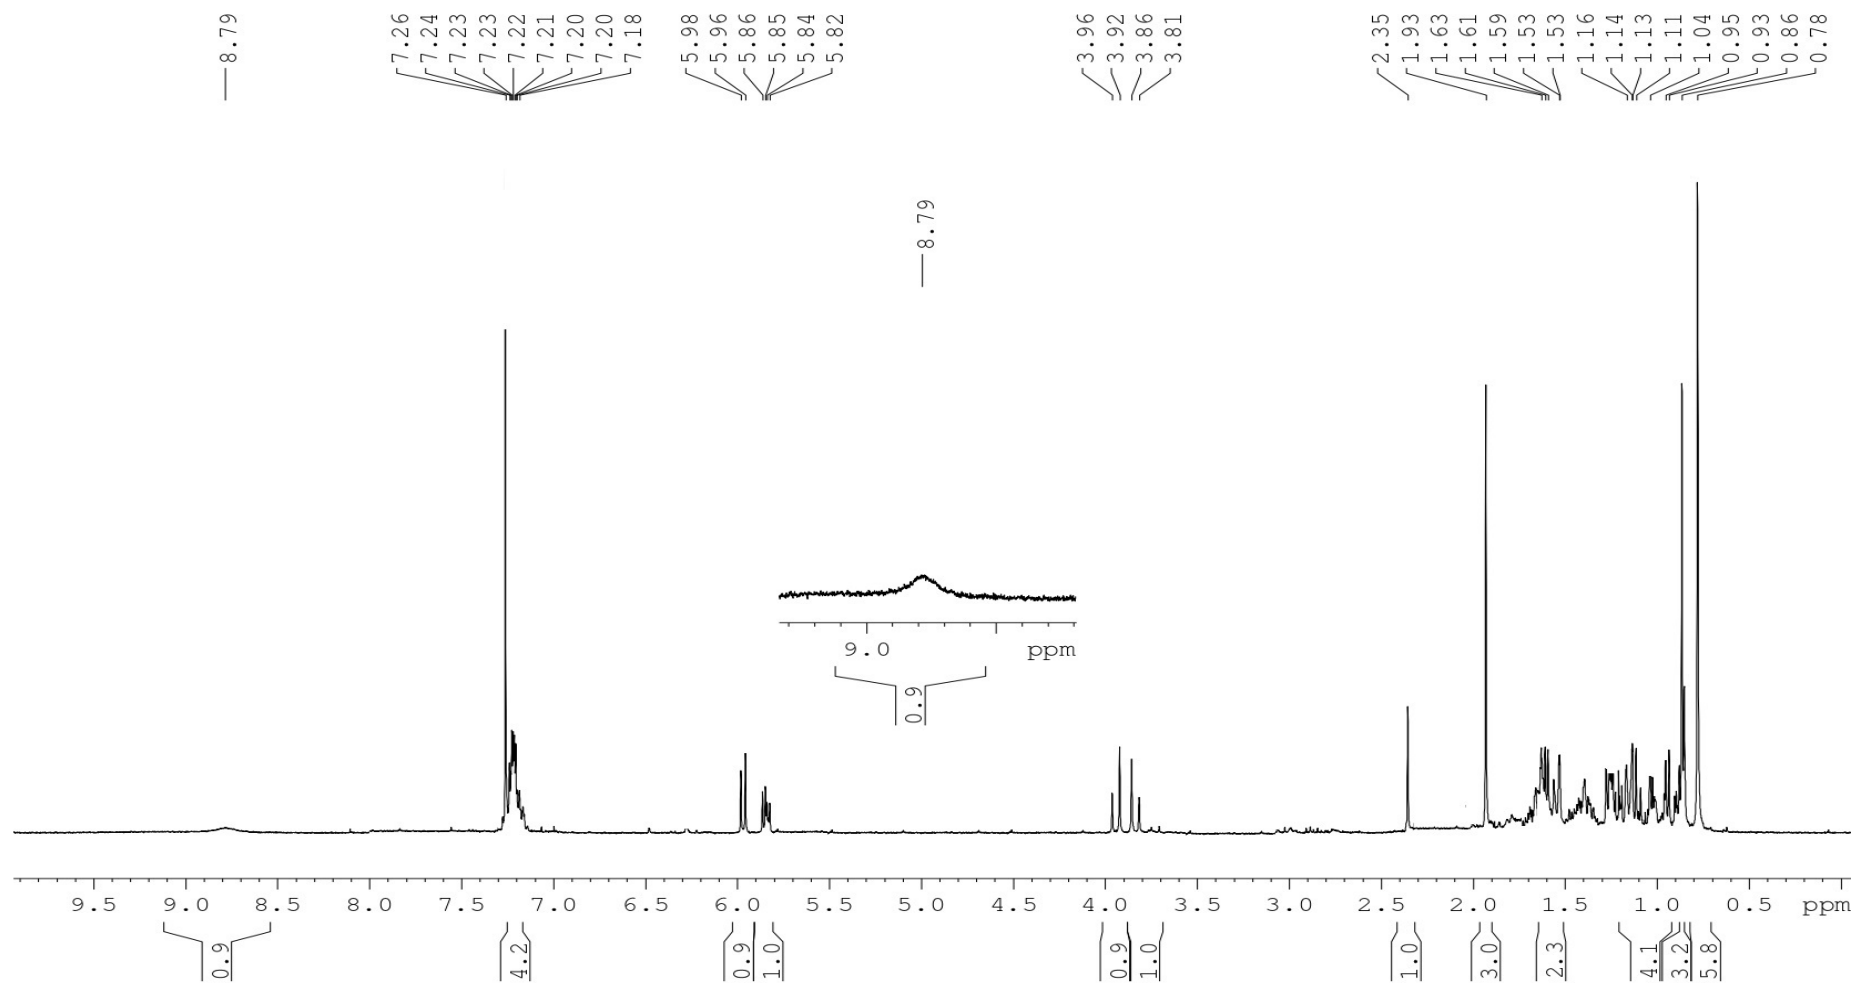

**$^{13}\text{C}$  NMR spectrum of compound 21**

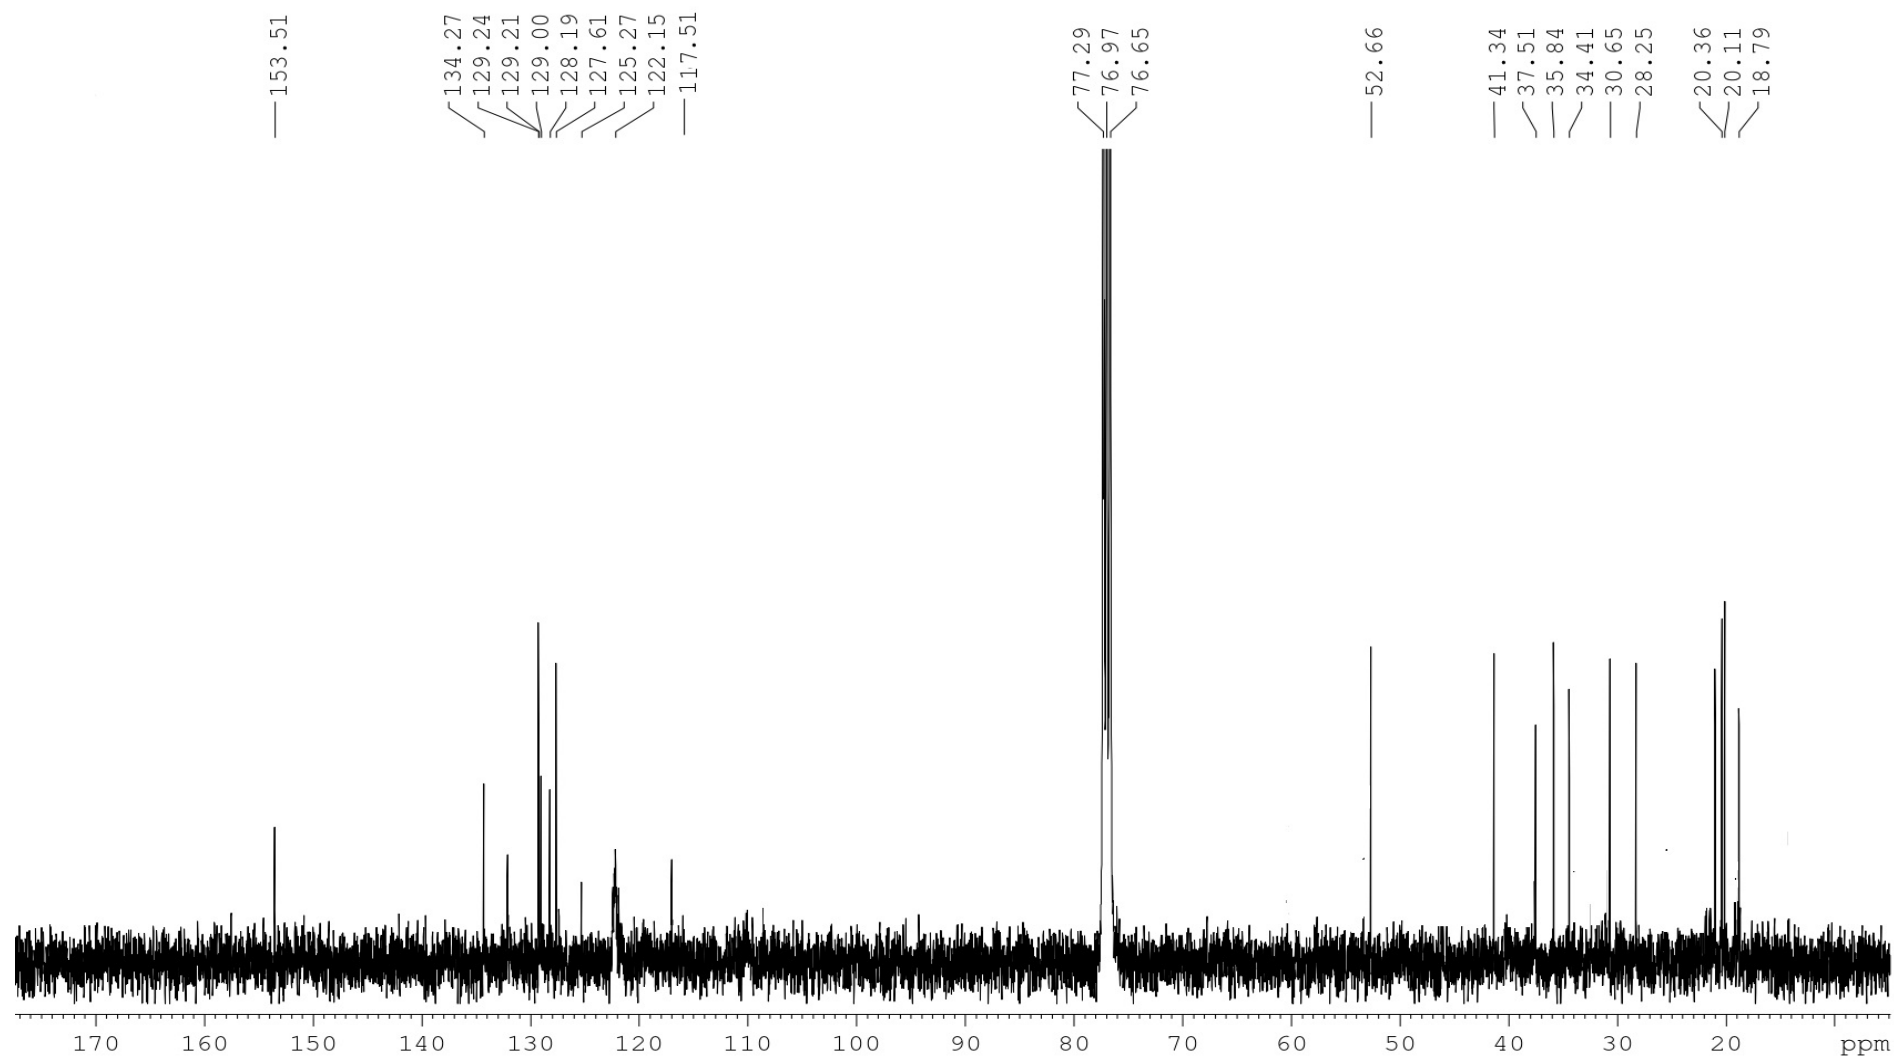

<sup>1</sup>H NMR spectrum of compound 22

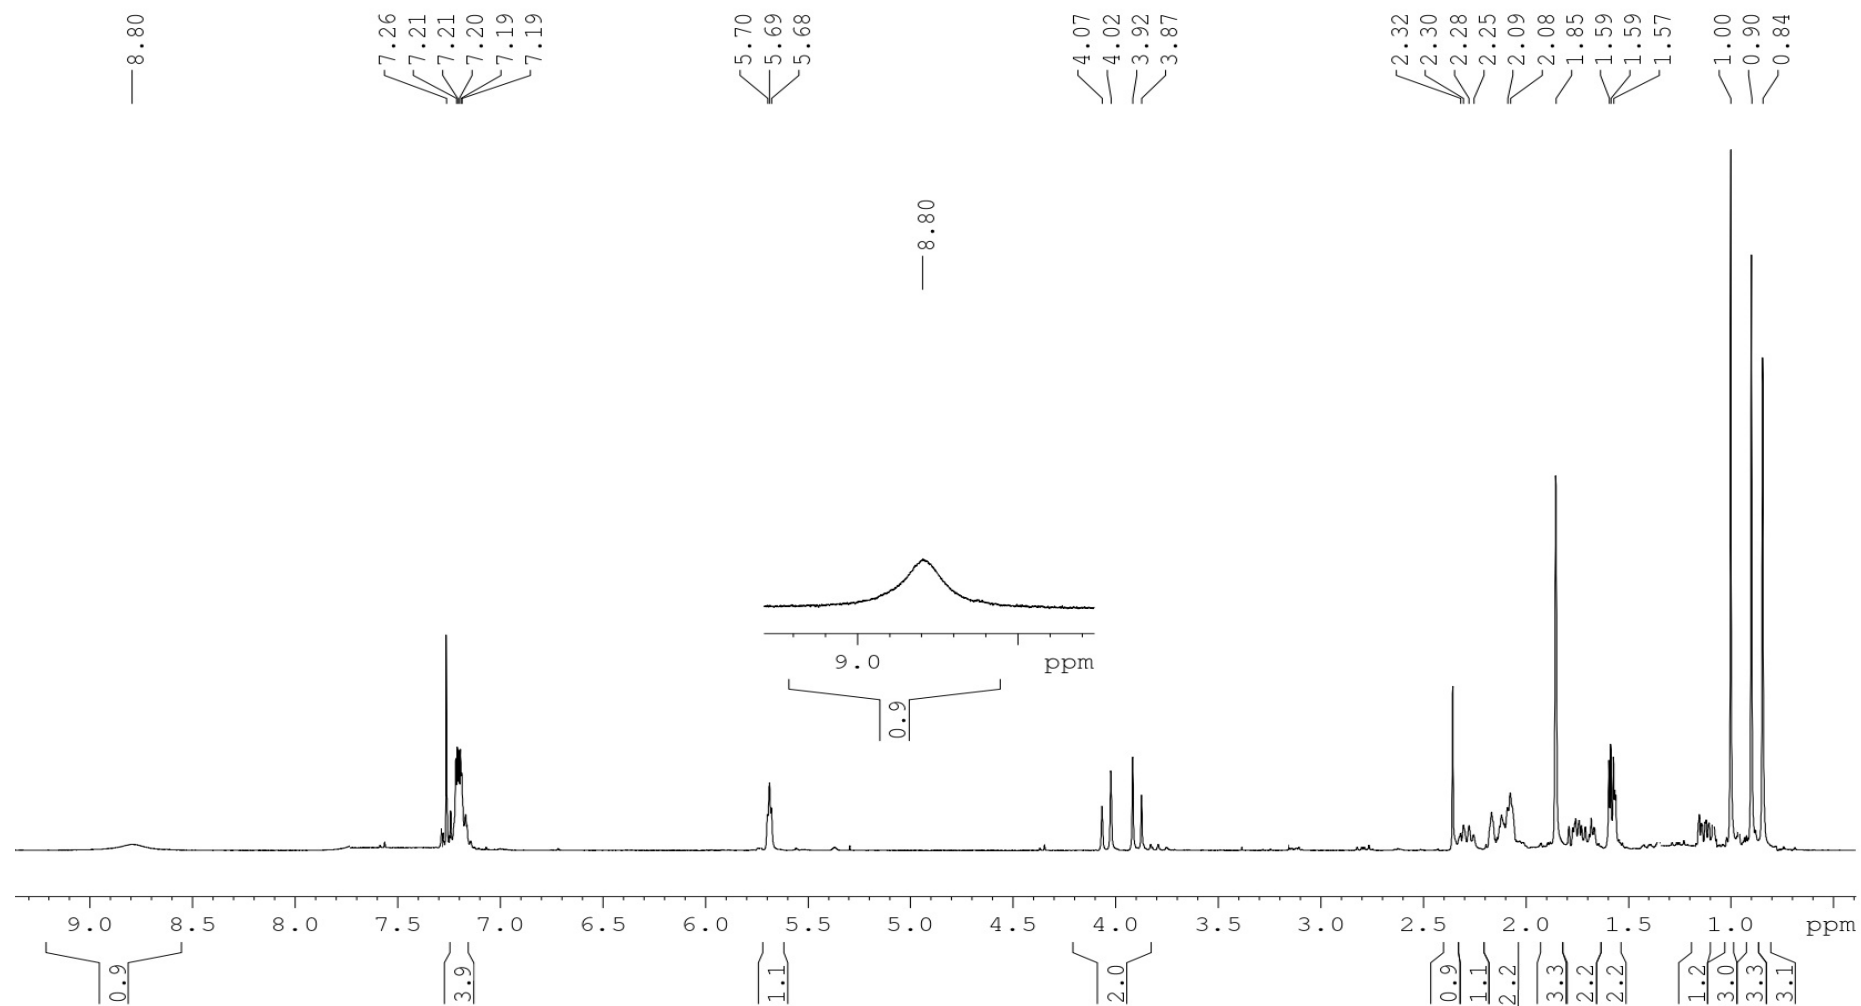

**$^{13}\text{C}$  NMR spectrum of compound 22**

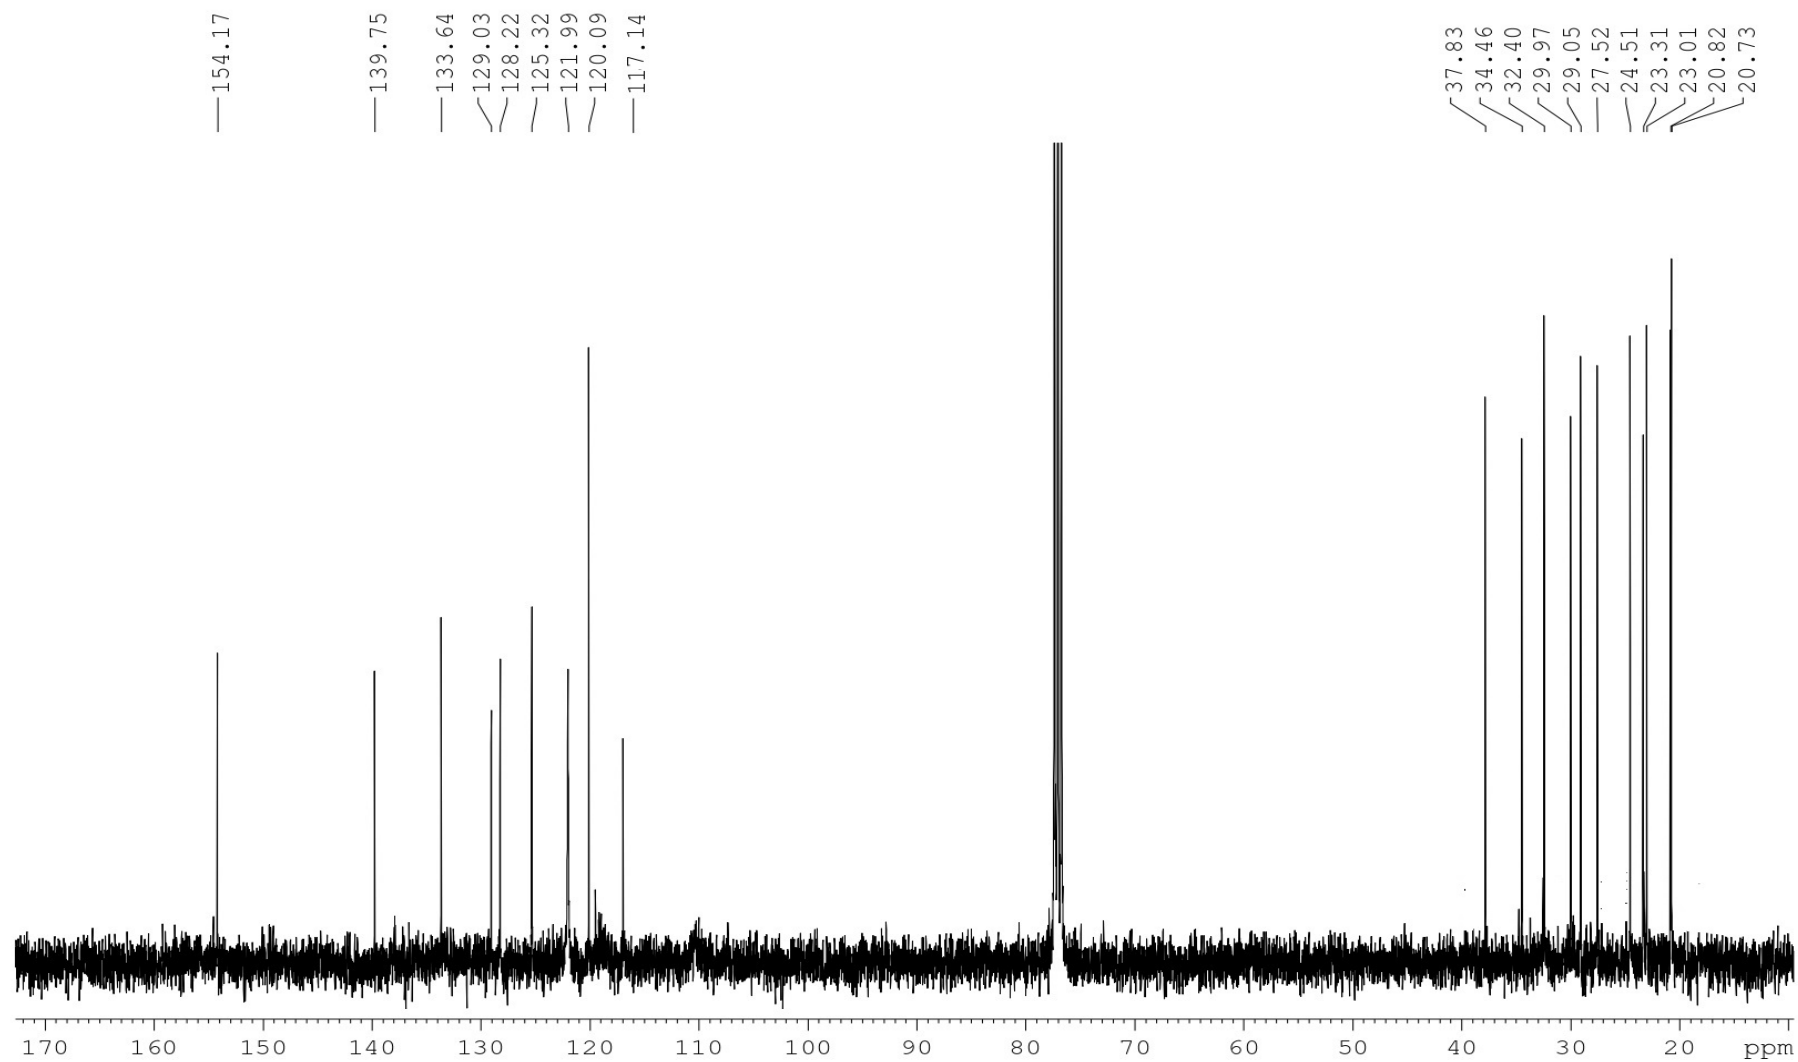



<sup>1</sup>H NMR spectrum of compound 23

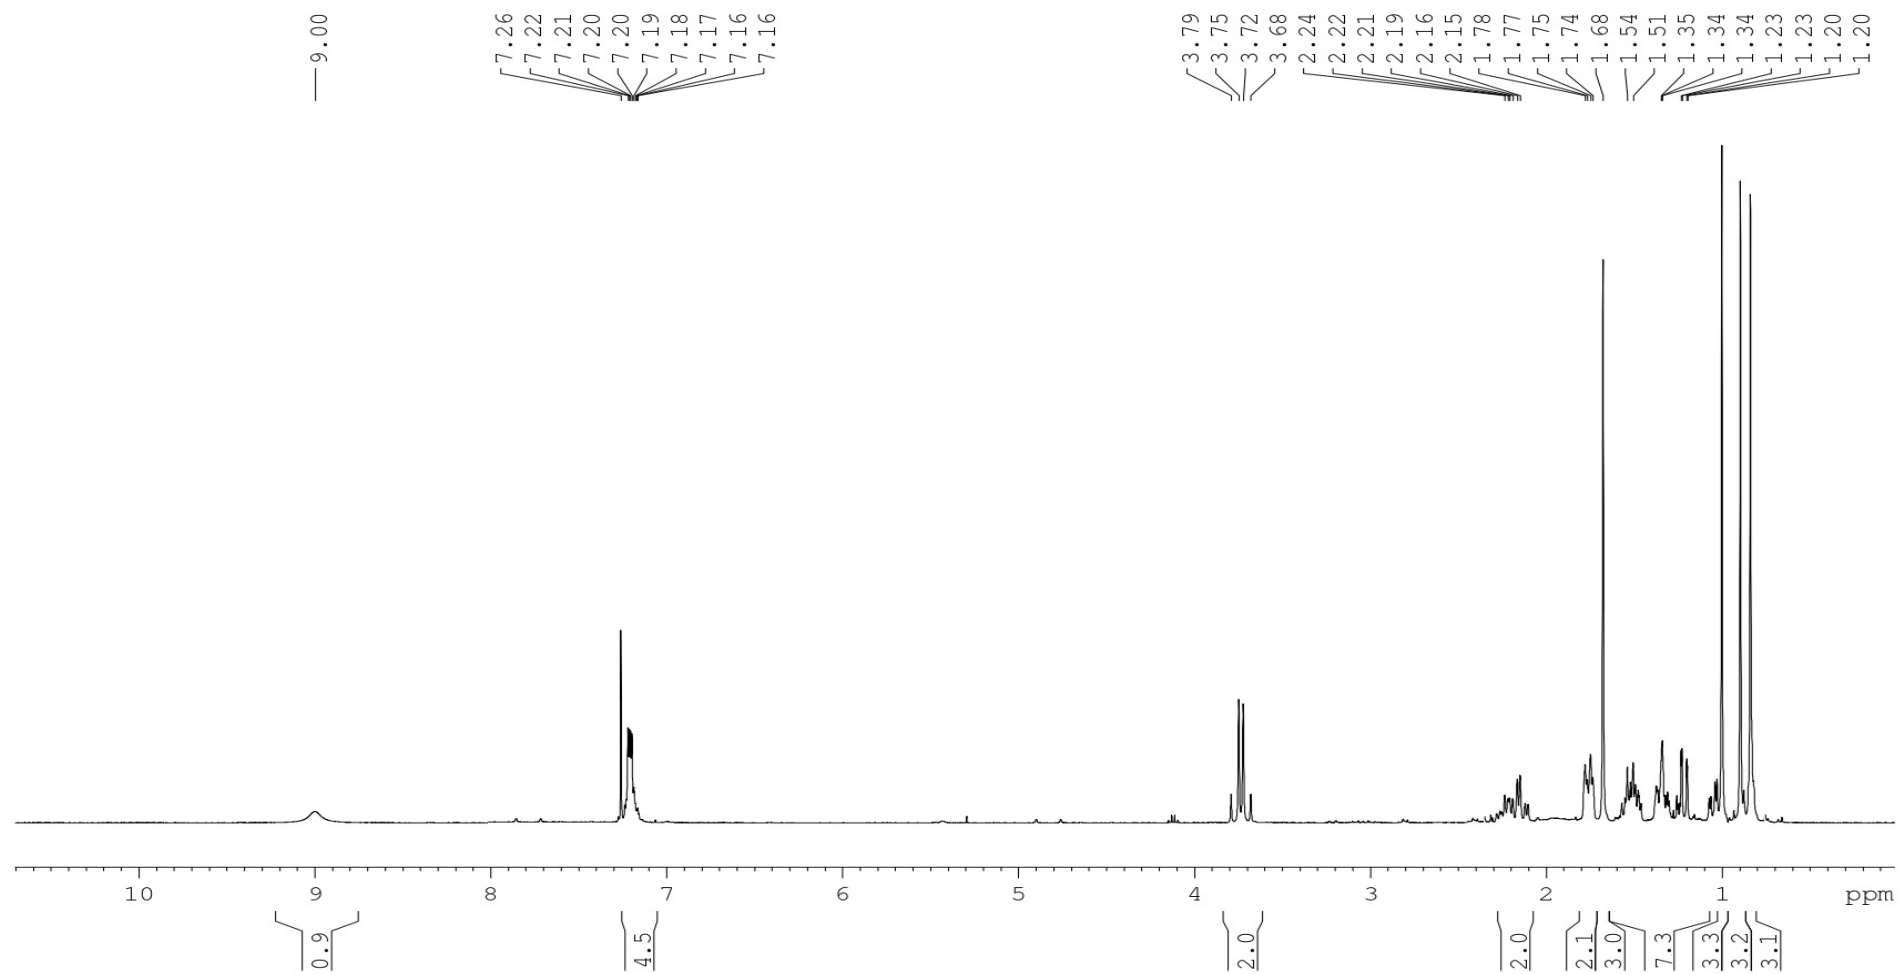

<sup>13</sup>C NMR spectrum of compound 23

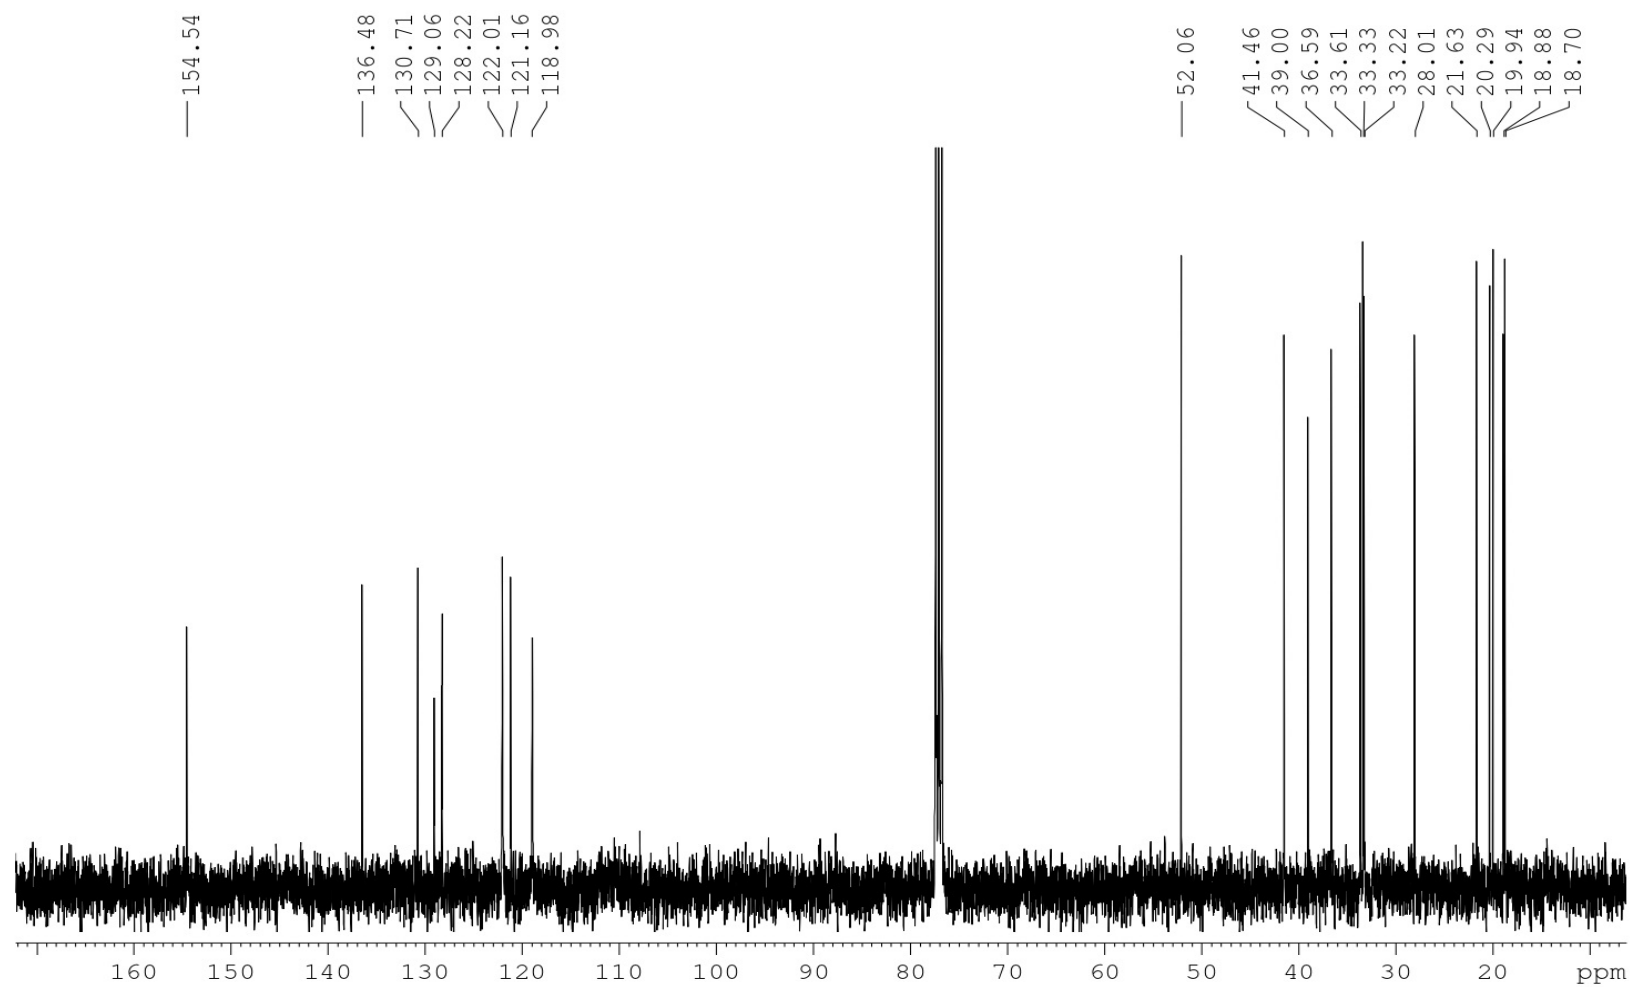

Supplement: s1 [file s1]
